## Public exams provide opportunities for deeper thought with less anxiety

Wiggins, Benjamin L.<sup>1\*</sup>; Lily, Leah S.<sup>12□</sup>; Busch, Carly A.<sup>3□</sup>; Landys, Meta M.<sup>4□</sup>;  
Shlichta, J. Gwen<sup>5□</sup>; Shi, Tianhong<sup>6□</sup>; Ngwenyama, Tandi R.<sup>7□</sup>

<sup>1</sup>Department of Biology, University of Washington, Seattle, WA (USA)

<sup>2</sup>Department of Biology, Western Washington University, Bellingham, WA (USA)

<sup>3</sup>School of Life Sciences, Arizona State University, Tempe, AZ (USA)

<sup>4</sup>Department of Integrative Biology, Oregon State University, Corvallis, OR (USA)

<sup>5</sup>Department of Biology, Edmonds College, Edmonds, WA (USA)

<sup>6</sup>Ecampus Division, Oregon State University, Corvallis, OR (USA)

<sup>7</sup>Carlson College of Veterinary Medicine, Oregon State University, Corvallis, OR (USA)

\*Corresponding author email: [benlwiggins@gmail.com](mailto:benlwiggins@gmail.com)

□These authors contributed equally to this work.

# Abstract:

Assessment methods across post-secondary education are traditionally constrained by logistics, built on prior practice instead of evidence, and contribute to the inequities in education outcomes. As part of attempts to improve and diversify the methods used in assessment, the authors have developed a flexible and low-tech style known as 'public exams' based in best practices. Public exams attempt to bring students authentically into the process of assessment through the use of pre-released portions of the exam. Through mixed-methods research at a closely-matched pair of an R1 and a community college classroom, we observe significant signals of positive impact from the public exam on student experiences. Public exams appear to result in deeper thought, more efficiently direct students to the core concepts in the discipline, and decrease anxiety in and around the exams. The public exam experience does not show evidence for exacerbating gaps in exam outcomes for students from minoritized backgrounds. This evidence suggests that public exams are an evidence-based, useful assessment style for instructors looking to improve their assessment design and implementation.

## Introduction:

High-stakes examination-based assessments (hereafter, exams) are a common and widespread feature of postsecondary education (1). Whether used to give formative feedback to students, to summatively assess students' knowledge, to create selection barriers for capacity-constrained programs or careers, or simply to assign grades for external use, these exams are complex structural elements that students must grapple with (2). Problematically, the educational practices used widely in college and universities are often based in traditional routines and logistical concerns instead of evidence-based, student-centered practices (3,4). Improving the practices of giving and taking exams has the potential to improve education for a more diverse, deeper, and thus more talented pool of future students (5).

The choices that professors make around assessment methods have profound impacts on students. Within a highly unequal power relationship, students have little to no voice about the ways in which they should be assessed. Students for whom college practices are new (to them, or to their communities) are figuring out the rules to the game on the fly; those rules change between classrooms. The same challenges that multilingual learners experience in monolingual classrooms play out (with higher stakes) during an exam. Anxiety around education can be exacerbated by exams and this anxiety tends to impact groups of students unjustly. Students from a wide array of diverse backgrounds find their progress metered by exam challenges that are designed by a professoriat that is rarely as diverse as they are (6). Because strategies and tactics change in meaningful ways even between closely matched practitioners, there is a wide range of experiences that a student might encounter even within a single institution or unit. Faculty are under constant pressure to use time effectively, and many evidence-based practices require significant investments of time, energy and training that are rarely valued at the level of research achievements or ratings of other aspects of teaching (7). The traditional style for postsecondary education is to reveal assessment tasks to students only at the exam itself. While a dynamic mix of active learning principles have become more widespread, similar best-practices in giving college exams are less-well defined and relatively difficult to take up even for the most conscientious of professors.

There are many ongoing attempts to improve the practices around exams, though largely at the practitioner level and less often codified in research literature. Our contribution is an interrelated set of evidence-based practices collectively described as the public exam system. While public exams are based in best practices well-known in education, here we describe the implementation and research findings that result. In this work, we take a lens of educative assessment: a theoretical framework summarizing that assessments have many purposes but the primary among them should be as a tool for facilitating student learning (8–12). Specifically, educative assessment suggests that educators can create challenges for students that are useful practice for their careers and lives such that teaching directly to those tests will be beneficial. Our methodology follows a design-based tradition in which education interventions are implemented and researched dynamically and iteratively and that each of our model organisms is a human being in a crucial, formative part of their life. To explore our research questions rigorously, we apply mixed quantitative and qualitative methods and attend to signals in the data that triangulate similarly across multiple types of investigation. Our goal in this work is to demonstrate how public exams impact college students.

## *What is a public exam?*

Public exams have three elements (or in other words, attempt to address three common problems):

- Partial exam content is released to students to deepen the thinking that students can do during their assessment. This allows students to read meta-information about their tasks beforehand as well as content that might take more time to comprehend than is available in a traditional exam. Traditionally, exam content is often encountered all at once in the context of the exam, and this rapid transmission of large amounts of relevant information constrains the asking of interesting and higher-order cognitive questions through the high volume of cognitive load (13). An example showing the remodeling of a traditional question into a pre-released version is shown in Figure 1. ‘Deepening thought’ is the coding term used below to address this theme.
- Pre-released exam content provides opportunities for students to edit much of the exam. Language barriers around exam content are hard to disassociate from true struggles with content. By allowing students an opportunity to give feedback on exam formats and wording, we leverage a larger group of motivated editors to address challenges that are separate from conceptual knowledge. These same developing experts can also contribute to the writing of the exam itself. Surprise-based exams cannot be co-created and the experience of power relationships and secrets can detract from positive student-teacher relationships that are crucial to maximizing learning. Whether by improving language, transparency or by utilizing students as exam question creators, we hope to draw students authentically into the creation of their own assessments. ‘Language barriers’ is the coding term used below to address this theme.
- Lastly, the pre-released material gives a direct conduit for instructors to amplify the parts of course material that are most important. Instead of indirectly indicating through study guides or practice exams or review sessions, students are given strong cues in the actual (partial) exam about the concepts and skills that are core to the discipline and that they are expected to master. We use the term ‘core concepts’ here to broadly describe the content that instructors believe is more central to the practice of their discipline. Surprise exams can only do this after the fact, at which point the opportunity to direct optimal study is generally lost. ‘Directing to core concepts’ is the coding term used below to address this theme.

As a simplified example, imagine an exam question in which the student is directed “For ten points, explain in three sentences or less how detoxification of human blood is performed by the cells in the liver.” By pre-releasing a version of the exam question that removes only the word ‘liver’, the possible variants of the exam question are increased to include at least several organs. While providing the meta-information for the task as well as the framing of the topic area itself, this question maintains enough secrecy to deeply examine student understanding. A further variant might be: “For ten points, explain in three sentences or less how [withheld] of human blood is performed by the cells in the [withheld].” By withholding just a single additional word, students are now given direct information about both the method/scope of written assessment as well as tangible evidence that their understanding of processes impacting human blood will be crucial for demonstrating mastery of the topic.

A timeline comparison of a public exam and a traditional exam is shown in Figure 1.

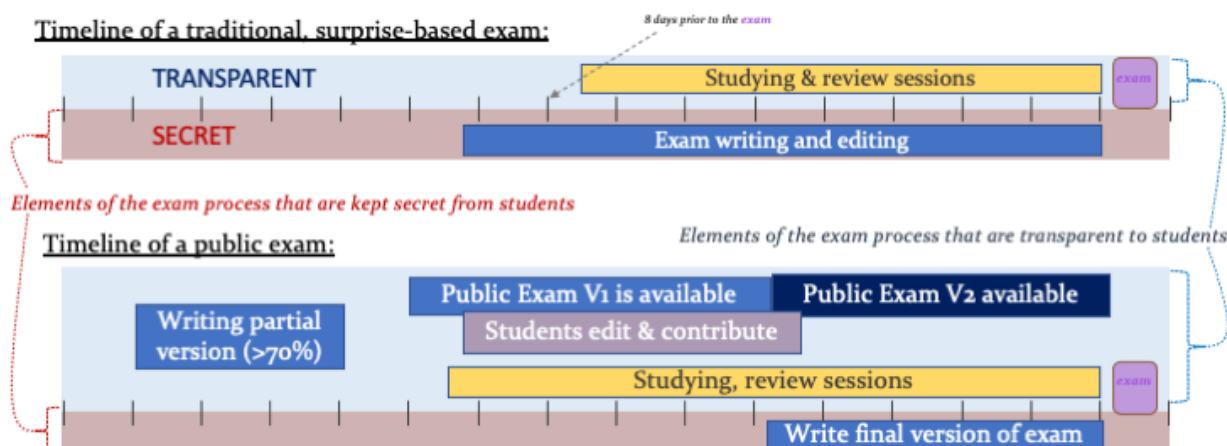

**Fig 1. Comparative timeline of traditional and public exams.**

Tasks to be completed are separated into those that are transparent to students and those that must necessarily be kept secret from students at the risk of giving away exam answers. For readers unfamiliar with traditional exams, the top timeline is offered as an approximation. The bottom timeline is an approximation of a public exam structure. The purpose of this figure is to illustrate the differences in increased transparency and opportunities to study from exam material in public exams.

The underlying goal in the three elements of public exams is to engender trust and authentic engagement between students and instructors. ‘Authentic involvement’ is the coding term used below to address this overarching theme relating to trust (14). The four evidence-based practices described above are frequently addressed throughout K-12 education and are useful in convincing students more often that the assessment process can work for them (15–17). A few types of examples of public questions are presented in Figure 2. Because students and classrooms differ so greatly, the use of the public exam style is not intended to be narrowly prescriptive. Instead, we offer this stylistic definition of public exams in order to a) help guide instructors incrementally farther from traditional, surprise-based exams and b) provide a basis for exploratory research to identify impacts on and for postsecondary students.

# Examples of public exam questions:

**Public Version of #1** Three molecules are interacting with each other through the formation of three hydrogen bonds. Draw three possible hydrogen bonds with dashed lines. Make the relevant partial charges clear. The three molecules are water, alanine, and [withheld].

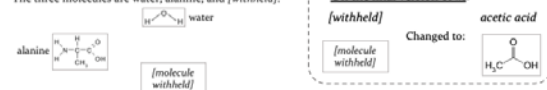

**Public Version of #2** How would platelet production change if [change to the platelet system withheld]?

- Many fewer platelets would be produced
- Many more platelets would be produced
- The same number of platelets will be produced
- [answer choice withheld]

On the final version of #2: [change to the platelet system withheld] Changed to: if TPO was degraded rapidly Platelets would be produced, but they will not be functional

**Public Version of #3**

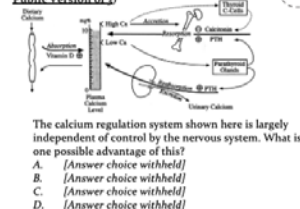

On the final version of #3: [Answer choice withheld] became: A. Bones do not have much contact with other kinds of cells besides osteoblasts and osteoclasts B. Neurons can only increase the action of another cell, so they would be useless when calcium is high C. Bone density can be independent of calcium levels D. Neurons rely on calcium, so they may not be reliable effectors when calcium is low

**Public Version of #4** In the fictitious prokaryote below, some of the genes on the single circular chromosome are shown along with their gene products. Central dogma transitions are shown in solid arrows, promoter sequences are indicated with a T<sup>-</sup> and a curved arrow, and protein interactions are shown by dashed arrows. The SerCPlus operon is generally associated with the bacterial behavior observed when the bacteria have arrived at a new, rich food source. The SerC channel facilitates diffusion of a wide range of nutrient molecules into the cell. Protein Q has a role in rapid cell crawling. This system functions in ways that are conceptually similar to well-studied parts of the lac operon in *E. coli*. [Question withheld]

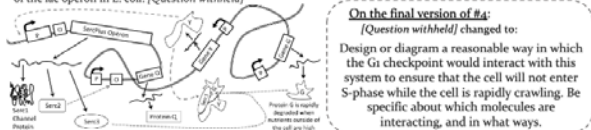

Fig 1. Examples of public-style exam questions.

For each of 4 exam questions, the pre-released version provided to students well before the exam is shown. In dashed insets are the changes made to the question for the actual version that students complete for course points. The purpose of this figure is to give examples of a few of the types of questions that can be used in public exams.

## Pedagogical Framework

Pedagogical frameworks that support the practice of public exams include cognitive load theory (7), retrieval practices (8), active learning (9), pedagogy of care (10) and inclusive pedagogy (11). When students engage with an exam, they are retrieving information from long-term memory into working memory in order to answer a test question. If the test questions are unfamiliar to students, do not match what was taught, or have unclear instructions, students are likely to experience cognitive overload (17,18), and ultimately negatively impact their academic performance. In public exams, giving students opportunities to practice test questions in similar formats and similar content is a solution aiming to reduce cognitive load and, ultimately, test anxiety. Another effect of giving students opportunities to practice test questions is utilizing the benefits of retrieval practice to achieve mastery learning. Researchers define active learning as “instructional activities involving students in doing things and thinking about what they are doing” (3,19,20). Allowing students to engage with and edit the pre-released exam applies the principles of active learning. Public exams give students opportunities to remove any potential cultural barriers or linguistic barriers to a full understanding of the test questions, aiming to create an inclusive learning environment for all students. Pedagogy of care is defined as “a teaching practice based on reciprocity where teachers take on the role of caregiving and students receive care on the basis of the teachers concern for their overall well-being” (21). Public exams apply pedagogy of care by attending to students’ emotional stress related to test anxiety. Inclusive pedagogy is the application of the diversity and inclusive social movement into

education, and is a student-centered approach to teaching and learning that supports learners of all backgrounds (22). The public exam style is designed to align with evidence-based research on best practices in assessment. A few examples of pre-released exam questions, and the ways in which these are finalized for the actual summative exam, are provided in Figure 1.

## Research Questions:

Our research questions are the following:

- In what ways do public exams impact the student experience?
  - Are these impacts negative or positive?
  - Are these experiences impacted by Language issues, Directing to core concepts, Deepening thought, and/or Authentic engagement?
- Do public exams impact grade equity?
- Are public exams likely to be applicable across postsecondary education contexts?

In summary, exams are a widespread and problematically complex aspect of the college experience. Public exams are designed around best practices in education, but the combined application of these methods has not been rigorously studied. We apply mixed-method design research to understand how and for which students public exams can impact their educative experiences in college courses.

## Methods:

### *Research environments:*

Research was conducted at a research university (R1) and a community college (CC) in the Pacific Northwest of the United States. Students were enrolled in lower-division courses in Biology departments during Spring quarter of 2021. The R1 course was taught for 300 students and the CC course was taught for 48 students from which populations of 292 and 32 participants, respectively, were included through IRB-approved consent processes (under protocol #s STUDY00012237, ECIRB-20210512 and IRB-2020-0813). These courses were chosen for consistency of general topic and level, for the large population in the R1 course which allowed quantitative analysis of subgroups, and for institutional access to research. Students in the R1/CC courses were 63%/59% non-white, 77%/66% registrar-identified female, 24%/20% first-generation attending college, 12%/24% international and (at the R1) 31% identified as being from historically underserved populations by the R1 university. Students in both courses typically have interest in a wide range of career goals around healthcare, science, research and business. Participants in both courses were randomly recruited to be part of interviews. Public exam techniques were used in both courses. Both the CC and R1 courses were using public exams for the first time in those environments. In the large R1 course, students were graded largely on the basis of 5 exams given every 2 weeks throughout the 10-week quarter. In the smaller CC course, students completed two exams written in the public exam style.

### *Research flow:*



This work was conducted using a design-based research methodology, which allows for preliminary research findings to be used to guide the collection and analysis of subsequent data (23). Examining human experiences in this is intended to be more rigorous than simple, self-reported data, while allowing a greater breadth of possible findings than quantitative experiments in learning alone. This methodology is a good fit for education systems where iterative redesign and incremental improvement of human experiences are the primary goals of research and implementation work (24). Here, we used qualitative interviews to broadly assess the experiences of students taking public exams. Those interview findings refined the coding used for larger-scale analysis of open-ended survey questions, and it is in these survey questions that quantifiable coding has revealed significant findings. In parallel to this qualitative and mixed-method work, students in the R1 course took exams that used both public and traditional questions to observe signals of inequity in exam outcomes. This experimental design controls for student, instructor, classroom environment, and content material. Any impacts of the public exam system that are observed are likely to be conservative because of issues with first-time implementation fidelity (in both R1 and CC courses) and incomplete application of the public exam system (in the R1 course). Student self-reported preferences for exam style were collected for triangulating with other types of data. Qualitative and quantitative data collection is described below and in Figure 3.

### Data collection in Spring quarter of 2021:

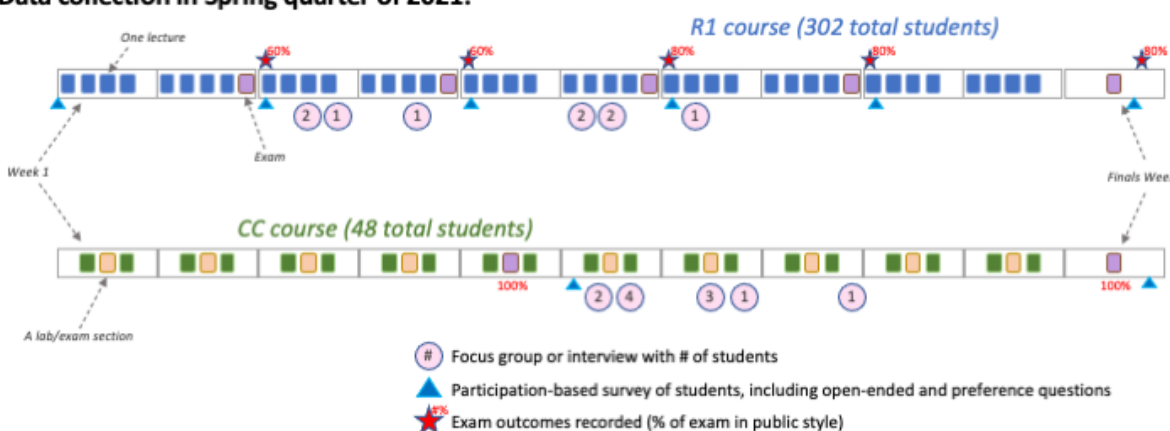

Fig 3. **Data collection scheme.**

The purpose of this figure is to make clear when and in which class environment the data were being collected.

### Coding of open-ended survey questions:

Open-ended survey questions were used as a quantifiable source of qualitative data. On a participation-only study, students at both sites were asked to answer the question: “Did the style of exams in [this course] work for you? Why or Why not?”. Responses were collected and anonymized from 242 participants at the R1 site and 32 participants at the CC site.

Open-ended survey responses were coded for seven thematic codes that emerged through qualitative analysis of interviews. Each code was also sub-coded as positive or negative with regards to outcomes for students. This was not opinion-based coding on the part of students (in other words, not a question about what they enjoyed or appreciated) but rather researcher-based assessment of whether the practices or experiences presented were positive or negative based on educational best practices. For example, a student who indicated “The public exam made it harder to know what I needed to know” would be coded into the category of



'Directing to core concepts' and as a 'Negative' impact, since confusion about core concepts is a problematic distractor for learning across fields (17,25,26). If a student indicated that they '*I hate public exams because they force me to think more deeply*', then this would be coded as a 'Positive' impact within the theme of 'Deeper thought', even though the student may not have enjoyed that aspect of the learning challenge. These seven themes, which were earlier analyzed or emerged in interview, were then coded for presence in the larger survey-based set of 242 open-ended responses by LSL and BW. Quantitative results from open-ended coding are presented below, and coding examples are available in [Supplement 1](#).

### *Qualitative interviews:*

Facilitation of interviews and transcription were completed by an experienced qualitative researcher (LSL) who has an M.Ed. in Curriculum and Instruction, was a Research Assistant on the project, has experience in clinical psychology, and has prior publications using qualitative coding and interview research in education (27–29).

Group and individual interviews were used to hear student experiences using grounded ethnographic principles (30,31) and with subject-centered and -driven methodology from dialectical behavioral therapy (32). Eleven interviews totalled 488 minutes of recorded discourse with 19 participants. Student participants were recruited to participate via random email to course lists. Interviewer non-affiliation with the courses was communicated and students were given a small Starbucks card for participating in the Zoom interview. Participants did not know the interviewer prior to the interview process. Data around the interviews at both sites as well as all transcripts are available in [Supplement 2](#).

Broad experiential opening questions were used (e.g. "How is [course] treating you?") to elicit a broad spectrum of conversations around students' experiences (33). Rather than bringing in specific questions or prompts, the facilitator followed up with probing questions on student-raised topics pertaining to our research questions. Opportunities to segue organically into these discussions were taken using light reinforcement and broad questioning (30). This method enabled us to influence the focus of discussion without disclosing our specific research methods or interests, which permits students to consider their impressions of the course and content within their own framework of values, memories, and needs. Anonymized transcripts of recorded conversations were analyzed afterwards, and participants did not give feedback on the findings. Thematic representation saturated (34) at the R1 site after 6 interviews, so interviews at this site were discontinued.

### *Qualitative analysis of interviews:*

Transcripts of interviews were analyzed by coding of statements. Initially, we prioritized the following four themes drawn from our research questions: 1) Language issues, 2) Directing to core concepts, 3) Deepening thought, and 4) Authentic engagement. These original four themes were evident in interviews, and the descriptive language found in the coding tables was iteratively improved for clarity and to better match student language. While several themes appeared to be less frequently encountered, other new areas emerged throughout analysis. Two additional codes were added: 5) Anxiety or Confidence and 6) Collaboration. Lastly, a final code was added to make note of problems in the exam experience that were independent of the public exam system: 7) Not P.E.S. This was done to record student experiences that fell outside of our main research questions. Transcripts were subsequently re-coded using this improved

set of seven codes. The final coding table for interviews with exemplary quotes is available in [Supplement 3](#).

### *Quantitative data collection and analysis:*

Within the large R1 course, the following discrete data were collected for each participant: College GPA, course grade, exam results for each question on each exam, scores for participation-based assignments, survey questions regarding exam style preferences, completion of a public-exam-based editing activity, results from additional research-based survey questions including the open-ended question used for coding, and (via the university registrar) race/ethnicity, gender, international student status, first-generation in college status, and inclusion in the university-assigned Education Opportunity Program (EOP). This last categorization is particularly important to this work: the R1 institution defines “under-advantaged” students as students identified as part of the EOP and these students hail from educationally or economically disadvantaged backgrounds. Because this EOP categorization is based on family income and other variables not typically represented in simpler demographic statistics, we chose this measure as the single variable on which we would pre-build models for analysis as has been used in other, similar work (35–37). All data collected in these ways are available in anonymized form in [Supplement 4](#).

Students began the quarter with two exams that used the same distribution of multiple choice questions: 15 public-style questions and 10 traditional, surprise-style questions. Subsequent exams (in response to student survey responses, see discussion) included 20 public-style questions and 5 traditional, surprise-style questions. In order to determine if students performed differently on public or traditional exams, we used a two-sample t-test to compare the total percentage of points students earned on all public questions and all traditional questions throughout the term.

In order to determine whether there were differences in exam performance on each type of exam question based on students’ demographic characteristics, we used linear regression models and included gender (male/female), EOP group of interest (yes/no), and overall GPA (from the registrar on a 4-point scale) as predictors. (Example model: percent score on public questions ~ gender + interest group + GPA.) Gender has been shown to affect student exam performance (38) and students in our EOP group of interest have been found to do worse than their peers on exams at this institution (35). We acknowledge that registrar data for gender that includes only male/female do not best represent all individuals’ gender identity and that not every person identifies in the gender binary (39), but we did not ask students to self-report their gender.

To examine potential demographic differences in students’ preference for the proportion of each question type on an exam, after the second and third exams, we asked students if they would prefer to have more public questions, fewer public questions, or keep the same ratio of public to traditional questions for future exams. After the fourth exam, we asked students if they would prefer more or fewer public questions with no neutral option. We calculated the percentage of students who selected each option and assessed potential demographic differences of students’ preferences after the second and third exams using multinomial regressions and using logistic regression for preferences after the fourth exam. We again included gender (male/female), EOP group of interest (yes/no), and overall GPA (based on registrar data on a 4-point scale) in our models. (Model for post-exam two and three

preferences: exam preference (more public/fewer public/same) ~ gender + interest group + GPA; model for post-exam four preferences: exam preference (more public/fewer public) ~ gender + interest group + GPA.)

Preceding each exam, students were given the opportunity to provide edits on the public portion of the exam. This was an optional part of a required online assignment which students were able to bypass and still receive full participation points. To investigate the extent to which a student providing edits on the exams affected their overall course grade, we used a linear regression with the total number of exams for which the student provided edits, EOP group of interest (yes/no), and overall GPA as the predictors in our model. (Model: course grade ~ total edits + interest group + GPA.)

We calculated the percent of students who provided feedback on each aspect of the public exam system in the open-ended survey questions, and whether that feedback was positive or negative. To determine if there was a relationship between the type of feedback students provided (i.e., about the public exam system or not) and the nature of that feedback (i.e., positive or negative), we conducted a series of Pearson's chi-square tests of independence for each of the six factors of the public exam system as well as an aggregate of all six factors. This approach used the data coded as 'Not related to the Public Exam System' as a control group, which is more conservative than a simple control ratio like 1:1 and a better fit as it takes into account the likely general tendency for participants to report positive experiences more often than negative experiences. When a given count in the contingency table was too small (i.e., less than five) to conduct a chi-square test, we used a Fisher's exact test (40,41).

## Results:

### *In what ways do public exams impact the student experience?*

Here we explain impacts of public exams based on coding of open-ended student responses, from student preference surveys, and modeling of student outcomes based on a feature of student behavior around exam editing. Following this, we discuss the results of experiments on equity in exam outcomes and qualitative analysis of transferability between institutions.

### *Coding of open-ended responses:*

Students in the large R1 course were asked "Did the style of exams in [the R1 course] work for you? Why or Why not?". 242 responses were coded as Positive/Negative as described previously for one of 7 codes:

- Codes identified in the original qualitative research design based in educative assessment (8):
  - Language barriers
  - Directing to core concepts
  - Deeper and/or more creative thought
  - Authentic involvement in the process of assessment
- Emergent codes identified in qualitative interviews
  - Anxiety and/or confidence that decreases negative impacts of anxiety
  - Collaboration with other students
- A null code for issues unrelated to the public exam system (for example, barriers of internet connectivity or benefits of the teaching of a particular in-class session).

Results of the coding are presented in Table 1, and all coding data for open-ended questions is available in [Supplement 5](#). We observed a strongly significant statistical signal for the overall positive impacts of public exams (Row 1). No significance (positive or negative) was observed for student mentions of language barriers, authentic involvement in the process of assessment, or collaboration. Student experiences with ‘Directing to core concepts’ were strongly, significantly positive (p value = 0.0002). Student experiences with ‘Deeper thought’ were also significantly positive (p value = 0.004). Student experiences with ‘Anxiety’ were strongly, significantly positive (p value = 0.0101). Positive or negative experiential impact showed no statistical difference for students in the EOP group. These data suggest that students’ unprompted experiences with public exams are predominantly positive, which correlates well with preference data described below. These data also triangulate well with interview results noting that deeper cognitive work, decreased anxiety, and more efficient directing to core concepts are likely outcomes of public exams.

|                                                          | Signal Pos:Neg | Null Pos:Neg | $\chi^2$ Test Statistic                                                | P value |
|----------------------------------------------------------|----------------|--------------|------------------------------------------------------------------------|---------|
| Overall Impacts of Public Exams                          | 97:22          | 74:38        | 7.1547                                                                 | 0.0075  |
| Language barriers                                        | 9:9            | 74:38        | 1.7353                                                                 | 0.1877  |
| Authentic involvement                                    | 11:4           | 74:38        | 0.3152                                                                 | 0.5745  |
| Collaboration                                            | 13:0           | 74:38        | Cannot run test with a zero result.<br>Does not approach significance. |         |
| Directing to core concepts                               | 55:5           | 74:38        | 13.6508                                                                | 0.0002  |
| Deeper thought                                           | 27:2           | 74:38        | 8.2834                                                                 | 0.0040  |
| Anxiety                                                  | 31:4           | 74:38        | 6.6150                                                                 | 0.0101  |
| Results are different for students in minoritized groups | 24:9           | 19:15        | 2.0669                                                                 | 0.1505  |

**Table 1. Results of coding of open-ended questions.**

Instances of codes are tabulated from open-ended survey responses from 242 students in the R1 environment. In each entry for Signal (Column 2) and Null (Column 3) the results are presented as ‘PositiveInstances:NegativeInstances’. The Null ratio of codes used as a control is taken from all codes not related to features of the public exam for the same population of students. Significance tests compare Signal ratios to Null ratios (which are themselves conservatively more positive than 1:1) using a Chi-squared test statistic. The purpose of this table is to show which codes were found to have statistically significant presence in students’ unprompted self-reported experiences, and whether those codes had an impact that is likely to be positive or negative on learning.

## Preference surveys

In the large R1 course, students were asked about their preferences for public or traditional exam questions. After experiencing two mixed exams with 15 public and 10 traditional questions each, 41% of students preferred to keep the same distribution for future exams, 3% of students wanted more traditional questions, and 56% of students wanted future exams to have a greater proportion of public-style questions. After listening to this student voice and increasing the proportion of public questions for the following exam, students were surveyed with the same options. After this exam with 20 public and 5 traditional questions, 67% of students wanted to keep the increased 20:5 distribution while 6% wanted more traditional questions and 24% wanted more than 20 of the 25 questions to be public. Course instructors kept the 20:5 ratio for the next exam, and students after this exam were given only two options so as to better understand the preferences of the majority of students. In this final survey prior to the final exam, 15% of students wanted to decrease the number of public questions and 85% wanted to increase it. Throughout these exams, there was no significant signal for a demographic basis on which these preferences were made, nor was preference correlated with course grade outcomes.

### *Does editing of the exam impact students?*

As part of the public exam, students were given the opportunity to suggest edits or contributions to the public exam document itself. Three examples of the kinds of edits suggested by students were:

- Highlighting a grammatical error in the exam: The initial public exam had a question that ended with "...is likely to experience which of the following symptoms effects." A student responded via survey by writing "What do you mean by 'symptoms effects'? Is this asking which symptoms the patient will experience?". This made clear to the exam authors that the word 'effects' was confusing and could be removed.
- Suggesting an improvement to the grammar in the exam: An initial public question used the word 'reasonable', and a student noted "... 'reasonable' is a subjective and vague descriptor here, leaving it open to different interpretations." The student went on to suggest that the exam writers should "...either including a more precise definition of what you mean by 'reasonable' in the question or using a different word that more clearly gets at what you are looking for in this question would make it easier to understand. For example, by reasonable do you mean 'could possibly happen' or 'is likely to happen'?" The authors used one of these suggestions in later versions of the exam.
- Suggesting creative text to complete a question: A public question asked students to assess the conclusions that could be drawn from a given graph on clinical outcomes for patients with diabetes. A student suggested that one of the possible answers could be "Based on these graphs, should we be optimistic about the progress of diabetes care in the United States?". This answer choice was not taken up as written by exam authors, but did catalyze the use of a similar incorrect answer choice for a later version: "Based on these graphs, should we be pessimistic about the progress of diabetes care?".

Students who undertook these optional, non-credit opportunities, when controlling for course grades and demographic backgrounds, were significantly more likely to perform better in their overall course grade ( $p$  value = 0.000402). This result suggests that the act of being engaged and legitimately contributing to the exam, even for non-content contributions, may help students learn the concepts.

### *Do public exams impact grade equity?*

Prerequisite to understanding more about the specific impacts of public exams, and as part of feminist and anti-racist drives within education research, we want to ensure that public exams do not demonstrate negative impacts for groups of students that have been historically underserved by colleges and universities. Student exam outcomes on public and traditional

exam questions were analyzed for two groups of students: a university-identified diverse group of students in the Educational Opportunity Project (EOP), and the rest of the student population. This quantitative analysis of question-by-question exam outcomes in a large course is our most likely opportunity to observe a signal of inequitable outcomes. As shown in Figure 4, we observed in our model that all students performed better on public exam questions compared to traditional exam questions (blue lines). Because of the differences in learning processes between public and traditional questions, this is not a signal of value or learning differences between contents assessed in a given method. We also observed the expected decrease in high-stakes exam scores across question types for students from EOP minoritized groups (red lines). The combination of these trends was consistent for students in both EOP and non-EOP groups, giving no indication that public exam questions resulted in increasing inequity. These data suggest that public exams do not exacerbate the pernicious inequities that are frequently found in postsecondary education outcomes.

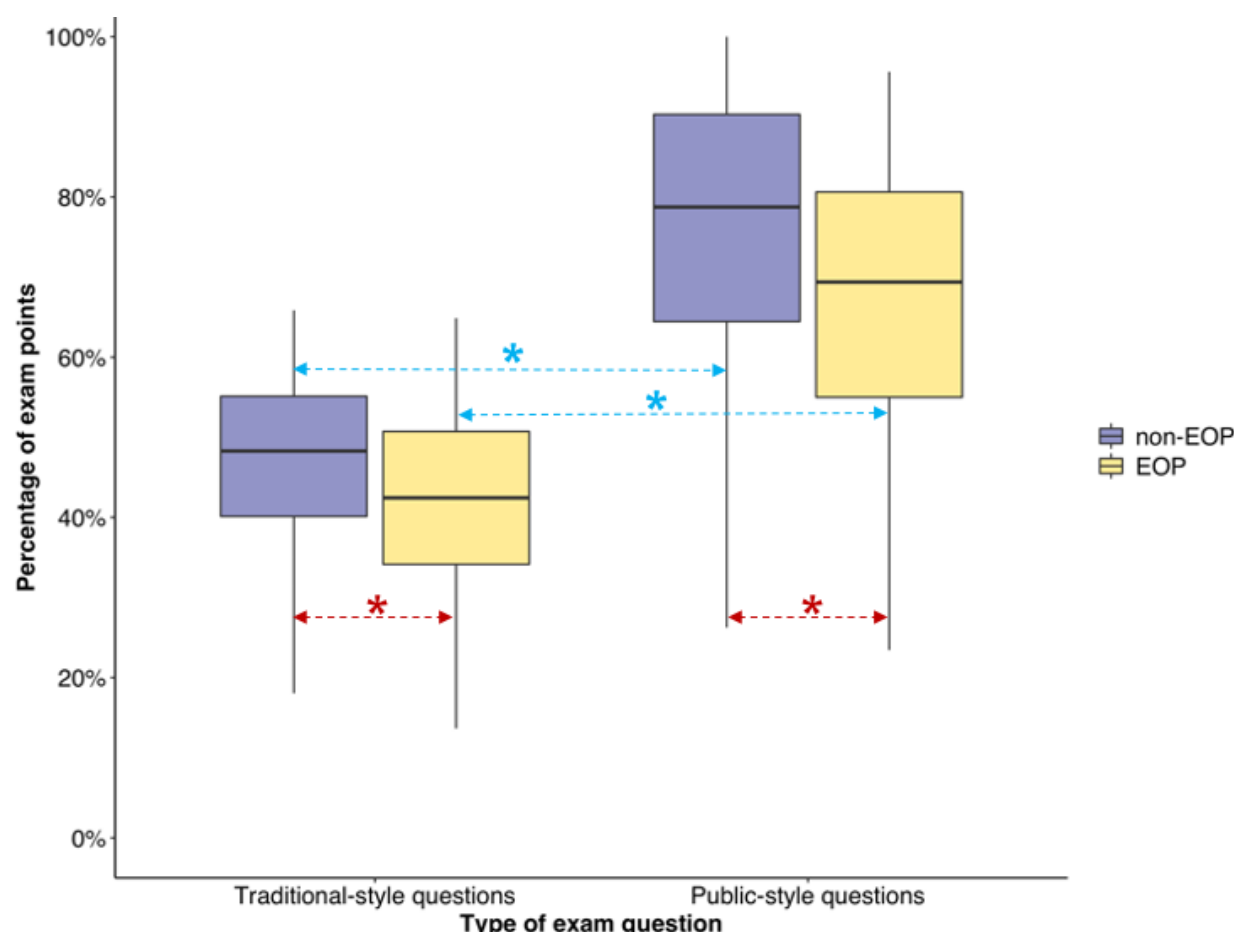

**Fig 4. Exam outcomes for traditional- and public-style exams.**

Color plots are separated by underserved EOP group in yellow and non-EOP (majority) group in purple. Significant differences were found in the higher scores for students on public style questions as compared to traditional questions (indicated with blue asterisks), although the difficulty or achievement on these questions cannot be directly compared as the learning structures were different. Significant differences were found in exam scores between groups of students, which is consistent with pernicious gaps in outcomes in postsecondary education (indicated with red asterisks). No differences in the patterns of outcomes for traditional/public questions were found in either group of students, which is consistent with public exams being similarly equitable compared to traditional exams. The purpose of this figure is to display the outcomes of this experiment intended to observe any differences in equitable treatment of students if they exist.



### *Are public exams likely to be applicable across postsecondary contexts?*

Our analysis is largely based on data collected in an R1 institution. While R1 institutions are frequently the site for postsecondary education research projects, they account for a relatively small proportion of postsecondary students. Crucially, interventions must be useful in larger contexts like primarily undergraduate institutions, comprehensive colleges, and (perhaps most importantly) the vast community college system. To better understand whether public exams might be applicable to community college courses, which are generally smaller and less available to quantitative research, we undertook a similar qualitative study in a community college course. This CC course closely matched the R1 course in terms of topic, location, timeline, and the first-time use of the public exam style for the course. Comparing two environments through qualitative interviews is an inexact method, but it is a rigorous way to explore broadly for signals that there are substantial important differences in either the environment or the intervention. In this case, analysis through iterative coding of interview transcripts brought us to the conclusion that students in the two courses had similar experiences with public exams. Our primary codes were evident in similar proportions, and student comments to interviewers brought up similar challenges and gains. For example, a CC student noted that:

*“we were able to sit down and start bouncing information off of each other and asking different questions about the questions...just kinda sharing information right before the exam and that just gave me so much confidence as to how much I know going into the exam so”* [Interview 11, page 7]

This student suggests a deeper questioning style beyond memorization, and notes the affective impact of this practice as well. A second CC participant mentioned:

*“it helps more with like understanding but sometimes when you’re panicking about an exam you’re like ‘I don’t want understanding ; I just wanna know’ but at the same time you do have to understand things...if we hadn’t had the public exam I would have studied all five of the chapters and had like less knowledge on each of the things and I don’t feel like I would have remembered the exact definition of phenotypic plasticity as well as like when I saw the question and was like, I really do need to know this for the exam.”*  
[Interview 10, page 2]

These three themes of Anxiety, Directing to core concepts and Deepening thought are evident here and were strongly present in both environments. Weaker themes of collaboration, language issues on exams, and authentic engagement with assessment were evident in both environments but less so. While we did identify emergent themes in this work, no thematic signals appeared to us in one environment and not the other. This is an initial attempt to explore the possible broad application of public exams, and clearly more research will be required on a greater scale to make similar conclusions. In the meantime, the outcomes of these analyses are consistent with public exams being similarly applicable across these two institution types.

### Discussion:

We have described here an initial mixed methods research program assessing the impacts of public exams on the student experience. Below we discuss the results and our current explanations for each of them, as well as future questions and limitations of this work.

#### *Discussion of the results of open-ended coding:*



Analysis of students' open-ended survey responses showed an overall significant and positive impact of public exams on student experiences in a large STEM course. The overall positive impact of public exams on student experiences was significant even when controlled against other student responses in the same environment. They also triangulate well with themes from interviews, preference surveys, and anecdotal narratives from public exam practitioners more widely. The aspects of student experiences that were strongly, significantly positive were in 1) Directing students to core concepts, 2) Deepening thought in the exam experience, and 3) Helping students to address problems around anxiety or confidence. These important benefits may be explainable from three different angles.

**Directing students to core concepts** speaks directly to a consistent challenge for novice learners. While accepting the deluge of information present in any fast-paced course, novice learners struggle to develop mental models to organize incoming information (26). Modern courses typically offer an array of learning materials to assist students in developing understanding of which pieces of information are core to the discipline and which pieces of information are facts or ideas that simply reinforce the concepts that an instructor feels are core to mastering the material in their course. Within the public exam structure, students have early access to exam materials that are directly connected to the reinforcement scheme of the course (typically, in course points). Instead of deducing from a string of lectures, assignments, study guides and other sources, students in a public exam course have the opportunity to infer value by placement (or not) on the actual assessment itself. Meta-contextual clues like the amount of exam points that can be earned can be a powerful reminder for students to study THIS skill and not THAT one. In contrast, traditional exams hide these valuable assessments until the moment of the exam itself. For students in multiple courses, or increasingly studying while maintaining employment, efficiency in deciding which parts of the course to study can help learning and keeping college work manageable. The significant, positive impact of 'Directing to core concepts' on public exams may be a reflection of these benefits to learning. In open ended responses in which students were asked "*Did the style of exams in [the R1 course] work for you? Why or Why not?*" students reported that having access to some part of the exam ahead of time allowed them to focus on what was important instead of feeling overwhelmed by all the content. As one R1 participant said:

*"...they provide me with some direction on what to study a lot for. I think that there's a lot of material that's covered in this course throughout the lectures, and it would be hard to remember every single detail from the textbook, so I think the guidance of the public questions really helps you to look back at that specific part in your notes and/or the lecture to refresh your memory on what you learned."*

Most instructors are frequently asked by students before exams, "What do I need to know for the exam?" Perhaps similar to some types of practice exams given before an exam, public exams were seen to provide a similar type of focus on important content.

**Deepening thought** for students was an original motivating factor in early development and implementation of the public exam style. For instructors, the 'flattening' of thought required by the logistical constraints in many types of assessments has been a constant source of dismay. While we would love to assess for creativity and critical thinking, evaluation of those responses is daunting especially at scale. It is possible that benefits from this style of exams come from the increase in higher-order questions (42–44), which was the intent of the designers but not rigorously assessed in this study. The significant, positive benefits from the public exam style may be due to shifting exam-provoked thought from a one-time performance into a longer and more collegial set of learning cycles (45). Because students are less limited by the time needed for reading an exam scenario, more interesting scenarios can be approached by the

instructor. Assessment materials transmit the values of the instructor into real terms (8,9). Moreover, students can spend their valuable study time working on intriguing, layered problems instead of re-hashing simple factual information. Students reported being challenged by the exam format to more in-depth learning of a concept. In interviews, students realized that with the extra time to think about and discuss questions, there was an expectation of exam responses that demonstrated deeper thought and synthesis. For example, a CC student said:

*“Personally I liked this type of exam a lot more. I didn't feel like I had to memorize anything. More like I understood the concept and could be asked questions about [it] from multiple angles. It helped learning with others as well because when explaining to other people a certain topic, and they begin to understand tells me that I understand the concept exceptionally well.”*

As more disciplines make calls for deeper critical thinking skills (46–49), it is possible the pre-release of exam material (as in (50)) is a motivating factor in pushing students to do, share, and enjoy this deeper thought.

**Anxiety** around education (and more specifically exams) is a constant and increasingly-pressing concern (51,52). While this is well-studied in STEM courses (53–55), it may be more relevant instead to courses for which high-stakes exams are a primary feature (56–58). STEM courses (among many others) generally meet this description (59). Learning is maximized at moderate levels of stress (60), but greater stress hampers learning and motivation and disproportionately impacts students from groups traditionally underrepresented in the holders of college degrees (61–64). There is some indication that this current most-diverse and most-economically challenged generation of students in college are also understandably the most over-stressed that have ever enrolled (65). With less anxiety associated with the surprise of the exam, they were able to feel more confident and prepared. A R1 student noted:

*“... with the availability of the public exam I am able to study the possible directions the questions might take. It reduces the amount of stress and anxiety I usually get when I take exams, I feel more prepared.”*

Students reported a decrease in anxiety, albeit not always initially. Student experiences suggest that the positive perception of these exams takes time and that students need to get used to the new exam style. A second CC student described this evolution of mindset:

*“At first It was a bit of an adjustment because I had never taken a public exam, but the second time around I enjoyed it.”*

This sentiment was reiterated by a R1 student:

*“During the first exam of the quarter, the style of the exams did not work for me because the format was new and I barely knew what to do to prepare for it. As of now, the style of the exams is working for me because even though I second guess myself...”*

Public exams may help students to alleviate some of their stress through some familiarity with the assessment itself. The non-content information like formatting can be comprehended at relative leisure. Strategic points like where to focus effort and time can be usefully discussed and digested at home. Shifting non-content mental effort out of the exam performance time may explain why coding analysis shows better outcomes in public exams and would be in line with prior research (66,67). It is also possible that the steps made towards exam transparency have a role to play, as signals of equitable behavior on the part of powerful authorities may suggest to students that they need not worry about being caught in a negative power-dynamic over some other disputed element within assessment (68–70).

Although this study focused on several overarching themes associated with the public exam experience, student perception of the exam experience is paramount to getting students to buy-in to a non-traditional exam. The positive aspects of the public exam experience are not fully realized if students cannot take advantage of what this exam method offers. Therefore, students need to, at least at some level, feel that the public exam style works for them. Overall, student responses showed a net positive impact of public exams (Table 1). The open-ended student responses allowed us to dissect the student's perception of the exam experience to understand why students felt positively towards this testing method.

### *Discussion of the preferences for different exam question styles*

Self-reported preferences for exam style were strongly in favor of public exams. A majority of students after two mixed-style exams were in favor of increasing the proportion of exams in the public style. That increase in proportion was made, and subsequent re-surveying indicated that students who wanted even more public exam questions outnumbered students who wanted fewer public exam questions by a ratio of roughly 4:1. Since the majority of students indicated a preference for the same 20:5 ratio in this survey, we repeated the measure after a fourth exam but constrained students to preferences of more or fewer public exam questions. 85% of 187 respondents to this query indicated that they would like more public exam questions. There was no significant difference in demographic backgrounds between these students and the participant population (272 participants in course data) as a whole. While it appears that students prefer public exam questions in this context, these data are presented only as a triangulation of other data sources that are more rigorous and less reliant on self-reporting surveys. If these preference surveys can be taken at face value, then student preferences for public exam questions are relatively strong and in accordance with findings from open-ended coding and qualitative interview analysis.

### *Discussion of the impact of exam editing for students*

Students who took advantage of the opportunity to provide edits and suggestions on public exams performed better in the class. Those edits are sparse among many exam questions, and the changes suggested rarely alter content, so this trend is unlikely to be explainable by gains on the particular question edited. The model controlled for demographics and for student course grade, so it is less likely that this is a self-selection of which students choose to take on this extra task. If the correlation observed ( $p$  value = 0.000402) indicates a causative relationship, then it may be explainable in one of three ways. It might be that students who engage with the exam in this editorial mode are finding a new way to engage with the material. By seeing the content from a different angle, one more closely aligned with the perspective of the faculty instructor, they may find their own perspective on the content to be broadened in useful ways. This is in line with learning theory about critical thinking skills (49). A second possibility is that engaging with assessment as a partner, even in a temporary way, may help students to feel authentically involved in the process of assessment. Affective impacts can improve learning (71), so this specific observation would be in line with learning theory. Lastly, it is possible that this result conflates students who did not provide edits with students who never accessed the public exam materials (even after frequent instructor guidance), which might contribute to their lower course grade. In the first two models, the benefit to student learning would be valuable and further research will be required to better understand how, for which students, and under what conditions this benefit is generated.

### *Discussion of how public exams impact on grade equity*

As with any education intervention, we worry that our intervention may contribute to the extant inequities in student outcomes within postsecondary education (72). Those concerns are most pressing for assessments, which are a point at which inequities are both created and

revealed. The primary goal of our quantitative experimental design in a large R1 course was to help understand if public exams are creating or exacerbating inequities for students from groups historically marginalized in postsecondary education. Close analysis of question-by-question outcomes make clear that these pernicious gaps in outcomes exist beyond our research environment: Students from minoritized groups are associated with lower scores on both public and traditional exam questions. Clearly, improving outcomes for all students will take much more than the use of public exams. Of particular importance for our study is that outcome gaps are not exacerbated by public exams. In other words, the gaps between public and traditional question outcomes are not different between groups of students. While we could imagine a hypothetical situation where some benefits from an intervention might be so positive as to be worth some negative impact on equity, it is relieving to know that this choice does not appear to be necessary and that public exams appear to be as inequitable or equitable as existing traditional exams.

### *Discussion of transferability of the public exam method between institution types*

We would be remiss not to consider how the context of the public exam affects how it impacts the student experience. Although the bulk of this research study was conducted at R1 institutions, our data from implementing public exams for one quarter at a CC indicate that the same themes are likely applicable across institution types. CC student responses to the open-ended question about exam style were very similar to those of R1 students. Students from both institution types most frequently reported that public exams helped with Directing to core concepts. The other codes that were most commonly coded across all institutions were Deepening thought and Helping with anxiety. CC student responses for the harmful impacts of the exam were similarly low and largely unrelated to public exams, therefore it is difficult to draw any conclusions from this data.

One salient criticism of public exams is that the process can be summarily characterized as ‘teaching to the test’. This pejorative has a long and well-deserved history in K-12 education, especially in situations where externally-created assessments are linked to a motivation to maximize scores for the purposes of accumulating outcome-linked resources (73,74). We propose that many college and university exams are fundamentally different in that the instructors have wide purview to create exactly the kinds of assessments that reflect the values, skills and content needed in modern pursuits. In other words, professors can create the kinds of exams for which ‘teaching to the exam’ is a great thing for students. Creating worthwhile assessments that help students to develop relevant and high-level skills is a core principle of educative assessment (9,75). We hope that public exams are a useful way to do this.

### *Limitations of this study:*

As an initial foray into research on public exams, this study has many limitations. The core features of public exams are examined as a unit, and more work will be required to understand if benefits can be achieved modularly. Largely a single-course study, this analysis may be conflated by the specific instructors or the environment of Spring 2021 (in itself, a unique time to be working in postsecondary education during a pandemic). Education impacts tend to be relatively weak in comparison of impact size to many scientific findings, so it is certainly possible that other important features have gone unexamined for lack of analytic power in a single course of 300 students. This is especially true for particular groups of students of historic importance, for whom numbers are smaller and backgrounds unique to this particular study environment. Perhaps most importantly, this study did not directly assess student learning but rather the student experience. We hope that the benefits demonstrated, combined with positive anecdotal reports on the strengthened student/instructor relationships in similar

courses, motivate future research to better understand how varied assessment styles can better serve the next generation of students and improve on this work.

### *Considerations for interested practitioners:*

Transitioning from traditional exams to a public exam style is a low-tech strategy to employ many of the practices identified in education literature to improve student learning. Instructors found that they could make simple changes to the exams or exam blueprints that they were already using by withholding some of the information. In many cases these adjustments shorten the exam by augmenting the higher level Bloom's questions and allowing students to discuss core concepts in more detail because students had more time to reflect on the question. Additionally, instructors were receiving meaningful feedback from students during the editing process of their new public exam that improved their exam questions. Importantly, instructors do not need to adjust the entire exam to the public method. Instructors can slowly transition to a greater percentage of the exam being publicly available over the quarter or semester or academic year. Anecdotally, students were excited to be part of the public exam process and a new assessment strategy that they participated in. This is the first research that we know of that has examined the impact of public exams on R1 and CC students. Our research suggests that public exams do not appear to create additional inequity, work similarly for R1 and CC students and, perhaps most importantly, are valued by students themselves. More research is going to be important to understand the impacts this type of exam has on student learning, particularly with respect to anxiety and impacts on students from minoritized groups.

Postsecondary instructors have numerous choices when designing exams (66,76–79). For those who want to take up public exams as a classroom practice, we suggest adjusting a small number of questions on an upcoming exam into a public, pre-released style. This helps create a positive feedback loop for instructor design and feedback from students, and it also helps to avoid taking on an unsustainable overhaul of all assessment in one course. In our experience, instructors who take up a few challenging pre-released questions a) quickly develop the communication needed for students to understand how and why to access the materials, and b) invariably lead to greater use of these methods in future assessments. Discussing an exam draft with someone experienced in public exams is especially useful; please do write to the corresponding author if this would be useful for you. A few examples of public exams (both pre-released and final versions) are available here in supplemental materials. An earlier, deeper, non-peer-reviewed logistical discussion of public exams within the field of molecular biology may be of interest to practitioners (80).

As already discussed, anxiety around education, particularly associated with exams, does not impact all groups of students equally. We have proposed that public exams may be a strategy to address some of the anxiety associated with taking exams. It is important to note that this student adjustment period as instructors move away from a more traditional exam may be longer for some students compared to others. Instructors may need to provide guidance and support during this adjustment period into the exam process. Some strategies that could facilitate a smoother transition are starting off with lower stakes quizzes or exams, practice assignments or quizzes, or setting up student groups where students can support each other. Although we did not find support for "Collaboration" in the quantitative coding analysis, at least some students recognized the advantage in collaboration when preparing for the exam. A R1 student described this by saying:

*"I have noticed that it only works for me when I work with other people in study sessions. I try to study on my own. I have a more difficult time understanding the*



*material, which is something quite new to me since I am used to studying on my own.  
But overall I like it."*

Students may not have recognized that collaboration was not only acceptable but highly encouraged, often not utilizing that strategy until later exams. As a CC participant explained:

*"I loved the second exam because I was able to meet up with others outside of the classroom to go over a couple different concepts before the exam."*

Emphasizing and encouraging collaboration as a strategy for student success on the exam, may be another way the instructor can facilitate the transition from a more traditional exam model.

### *Conclusion:*

In an initial study, we analyzed the impacts of public exams on student class experiences. The public exam method is likely to be similarly equitable to traditional methods and potentially applicable across institutional contexts. Our mixed-methods design research shows that students find significant, strong positive impacts on their experiences. Those impacts are largely focused on improving the direction of students to core concepts, the deepening of thought in the assessment process, and structural assistance for students in managing negative stress and anxiety. We present this work in the spirit of improving assessment for all students as a core feature of critical, high-quality education.

# Acknowledgments:

This work was funded by the generosity of a private, independent research gift from CourseHero, without which none of this research would have been possible. Participants and their data are protected by Institutional Review Boards under #s STUDY00012237 (University of Washington), ECIRB-20210512 (Edmonds Community College) and IRB-2020-0813 (Oregon State University). Thank you to the volunteers and staff at Seattle Public Libraries for maintaining access to research-quality facilities even throughout a global pandemic. We appreciate the efforts and contributions of Greg Crowther, Deb Donovan, Kelly Hennessey, Lori Kayes, Devon Quick, Christine Savolainen, Mandy Schivell, Katie Simons, Shelley Stromholt, Jeannette Takashima, Liz Warfield, and Seth Wiggins. C.A.B was supported by an NSF Graduate Research Fellowship Program Grant No. DGE-1311230. Any opinion, findings, and conclusions or recommendations expressed in this material are those of the authors(s) and do not necessarily reflect the views of the National Science Foundation.



## Bibliography:

1. Stobart G, Eggen T. High-stakes testing—value, fairness and consequences. *Assess Educ Princ Policy Pract.* 2012;19(1):1–6.
2. Wideen MF, O'Shea T, Pye I, Ivany G. High-stakes testing and the teaching of science. *Can J Educ Can Léducation.* 1997;428–44.
3. Ambrose SA, editor. *How learning works: seven research-based principles for smart teaching.* 1st ed. San Francisco, CA: Jossey-Bass; 2010. 301 p. (The Jossey-Bass higher and adult education series).
4. Handelsman J. *Scientific teaching.* New York: W.H. Freeman and Co.; 2006.
5. Intemann K. Why diversity matters: Understanding and applying the diversity component of the National Science Foundation's broader impacts criterion. *Soc Epistemol.* 2009;23(3–4):249–66.
6. Hurtado S. Linking diversity with the educational and civic missions of higher education. *Rev High Educ.* 2007;30(2):185–96.
7. Rossing JP, Lavitt MR. The neglected learner: A call to support integrative learning for faculty. *Lib Educ.* 2016;102(2):34–41.
8. Wiggins G. *Educative Assessment. Designing Assessments To Inform and Improve Student Performance.* ERIC; 1998.
9. Wiggins G. A true test: Toward more authentic and equitable assessment. *Phi Delta Kappan.* 2011;92(7):81–93.
10. Buxton CA, Alexsaht-Snyder M, Surriel R, Kayumova S, Choi Y, Bouton B, et al. Using educative assessments to support science teaching for middle school English-language learners. *J Sci Teach Educ.* 2013;24(2):347–66.
11. Jönsson A. *Educative assessment for/of teacher competency. A study of assessment and learning in the "Interactive examination" for student teachers.* Malmö University; 2008.
12. Fink LD. *A self-directed guide to designing courses for significant learning.* Univ Okla. 2003;27(11):1–33.
13. Sweller J. *Cognitive load theory: Recent theoretical advances.* 2010;
14. Brown B. *Braving the wilderness: The quest for true belonging and the courage to stand alone.* Random House; 2017.
15. Zeichner KM, Miller L, Silvernail DL, Darling-Hammond L, American Association of Colleges for Teacher Education, National Commission on Teaching & America's Future (U. S.). *Studies of excellence in teacher education: preparation in the undergraduate years.* Washington, DC: AACTE Publications; 2000. xi, 109 p. p.
16. Darling-Hammond L, Bransford J. *Preparing teachers for a changing world: what teachers should learn and be able to do.* 1st ed. San Francisco, CA: Jossey-Bass; 2005. xxx, 593 p. p.
17. Sawyer RK. *The Cambridge Handbook of the Learning Sciences.* 2nd ed. Cambridge University Press; 2006. 784 p. (Cambridge Handbooks in Psychology).
18. Kirschner PA. *Cognitive load theory: Implications of cognitive load theory on the design of learning.* Elsevier; 2002.
19. Moreira BFT, Pinto TSS, Starling DSV, Jaeger A. Retrieval practice in classroom settings: a review of applied research. In: *Frontiers in Education.* Frontiers; 2019. p. 5.
20. Bonwell CC, Eison JA. *Active Learning: Creating Excitement in the Classroom.* Washington, D.C.: The George Washington University, School of Education and Human Development; 1991.
21. Obuaku-Igwe C. Teaching and Re-Imagining the Role of Medical Sociology in South Africa During COVID-19: A Reflection. In: *Strategies for Student Support During a Global Crisis.* IGI Global; 2021. p. 175–94.
22. Shi T, Blau E. Contemporary Theories of Learning and Pedagogical Approaches for All Students to Achieve Success. In: *Optimizing Higher Education Learning Through Activities*

- and Assessments. IGI Global; 2020. p. 20–37.
23. Collins A, Joseph D, Bielaczyc K. Design Research: Theoretical and Methodological Issues. *J Learn Sci.* 2004 Jan 1;13:15–42.
24. Sandoval W& B. Design-based Research Methods for Studying Learning in Context. *Educ Psychol.* 2004;39:3.
25. Meyer H. Novice and expert teachers' conceptions of learners' prior knowledge. *Sci Educ.* 2004;88(6):970–83.
26. Bransford JD, Brown AL, Cocking RR. How people learn: Brain, mind, experience, and school. National Academy Press; 1999.
27. Dahlberg C, Lee S, Leaf D, Lily L, Wiggins B, Jordt H, et al. A Short, Course-Based Research Module Provides Metacognitive Benefits in the Form of More Sophisticated Problem Solving. *J Coll Sci Teach [Internet].* 2019 [cited 2019 Jul 29];048(04). Available from: [https://www.nsta.org/store/product\\_detail.aspx?id=10.2505/4/jcst19\\_048\\_04\\_22](https://www.nsta.org/store/product_detail.aspx?id=10.2505/4/jcst19_048_04_22)
28. Wiggins BL, Sefi-Cyr H, Lily LS, Dahlberg CL. Repetition Is Important to Students and Their Understanding during Laboratory Courses That Include Research. Vol. 22, *Journal of Microbiology & Biology Education.* 2021. p. e00158-21.
29. Wiggins BL, Eddy SL, Wener-Fligner L, Freisem K, Grunspan DZ, Theobald EJ, et al. ASPECT: A Survey to Assess Student Perspective of Engagement in an Active-Learning Classroom. *Cbe-Life Sci Educ.* 2017 Jun 20;16.
30. Rubin HJ. Qualitative interviewing: the art of hearing data. 3rd ed. Thousand Oaks, Calif.: SAGE; 2012.
31. Glaser BG, Strauss AL. The discovery of grounded theory: strategies for qualitative research. London,: Weidenfeld and Nicolson; 1968. xiii, 271 p. p. (Observations).
32. Linehan MM. Cognitive-behavioral treatment of borderline personality disorder. Guilford Publications; 2018.
33. Cameron J. Focusing on the focus group. In: *Qualitative Research Methods in Human Geography.* Oxford: Oxford University Press; 2005. p. 116–32.
34. Saunders B, Sim J, Kingstone T, Baker S, Waterfield J, Bartlam B, et al. Saturation in qualitative research: exploring its conceptualization and operationalization. *Qual Quant.* 2018;52(4):1893–907.
35. Wright CD, Eddy SL, Wenderoth MP, Abshire E, Blankenbiller M, Brownell SE. Cognitive difficulty and format of exams predicts gender and socioeconomic gaps in exam performance of students in introductory biology courses. *CBE—Life Sci Educ.* 2016;15(2):ar23.
36. Freeman S, Theobald R, Crowe AJ, Wenderoth MP. Likes attract: Students self-sort in a classroom by gender, demography, and academic characteristics. *Act Learn High Educ.* 2017;18(2):115–26.
37. Stanich CA, Pelch MA, Theobald EJ, Freeman S. A new approach to supplementary instruction narrows achievement and affect gaps for underrepresented minorities, first-generation students, and women. *Chem Educ Res Pract.* 2018;19(3):846–66.
38. Odom S, Boso H, Bowling S, Brownell S, Cotner S, Creech C, et al. Meta-analysis of Gender Performance Gaps in Undergraduate Natural Science Courses. *CBE—Life Sci Educ.* 2021;20(3):ar40.
39. Cooper KM, Auerbach AJJ, Bader JD, Beadles-Bohling AS, Brashears JA, Cline E, et al. Fourteen Recommendations to Create a More Inclusive Environment for LGBTQ+ Individuals in Academic Biology. *CBE—Life Sci Educ.* 2020 Jul 14;19(3):es6.
40. McCrum-Gardner E. Which is the correct statistical test to use? *Br J Oral Maxillofac Surg.* 2008;46(1):38–41.
41. Bower KM. When to use Fisher's exact test. In: *American Society for Quality, Six Sigma Forum Magazine.* 2003. p. 35–7.
42. Anderson LW, Krathwohl DR, editors. A taxonomy for learning, teaching, and assessing: a

- revision of Bloom's taxonomy of educational objectives. Complete ed. New York: Longman; 2001. 352 p.
43. Lemons PP, Lemons JD. Questions for assessing higher-order cognitive skills: It's not just Bloom's. *CBE—Life Sci Educ.* 2013;12(1):47–58.
44. Barnett JE, Francis AL. Using higher order thinking questions to foster critical thinking: A classroom study. *Educ Psychol.* 2012;32(2):201–11.
45. Schwartz DL, Lin X, Brophy S, Bransford JD. Toward the development of flexibly adaptive instructional designs. *Instr-Des Theor Models New Paradigm Instr Theory.* 1999;2:183–213.
46. AAAS. Vision and Change in Undergraduate Biology Education □ » Final Report [Internet]. 2011 [cited 2015 Oct 11]. Available from: <http://visionandchange.org/finalreport/>
47. Presidents Council of Advisors on Science and Technology. Engage to Excel: Producing One Million Additional College Graduates with Degrees in Science, Technology, Engineering, and Mathematics. 2012.
48. McConnell KD, Horan EM, Zimmerman B, Rhodes TL. We Have a Rubric for That: The VALUE Approach to Assessment. ERIC; 2019.
49. Halpern DF. Assessing the effectiveness of critical thinking instruction. *J Gen Educ.* 2001;50(4):270–86.
50. Crowther G, Wiggins B, Jenkins L. Testing in the Age of Active Learning: Test Question Templates Help to Align Activities and Assessments. *HAPS Educ.* 2020 May 6;24:74–81.
51. Disability NC on. Mental health on college campuses: Investments, accommodations needed to address student needs. 2017;
52. Health C for CM. 2020 Annual report (Publication No. STA 21-045). 2020;
53. Schussler EE, Weatherston M, Chen Musgrove MM, Brigati JR, England BJ. Student Perceptions of Instructor Supportiveness: What Characteristics Make a Difference? *CBE—Life Sci Educ.* 2021;20(2):ar29.
54. Cooper KM, Downing VR, Brownell SE. The influence of active learning practices on student anxiety in large-enrollment college science classrooms. *Int J STEM Educ.* 2018;5(1):1–18.
55. Downing VR, Cooper KM, Cala JM, Gin LE, Brownell SE. Fear of Negative Evaluation and Student Anxiety in Community College Active-Learning Science Courses. Vol. 19, *CBE—Life Sciences Education.* 2020. p. ar20.
56. Brady ST, Hard BM, Gross JJ. Reappraising test anxiety increases academic performance of first-year college students. *J Educ Psychol.* 2018;110(3):395.
57. Culler RE, Holahan CJ. Test anxiety and academic performance: The effects of study-related behaviors. *J Educ Psychol.* 1980;72(1):16.
58. Harris RB, Grunspan DZ, Pelch MA, Fernandes G, Ramirez G, Freeman S. Can test anxiety interventions alleviate a gender gap in an undergraduate STEM course? *CBE—Life Sci Educ.* 2019;18(3):ar35.
59. Momsen JL, Long TM, Wyse SA, Ebert-May D. Just the facts? Introductory undergraduate biology courses focus on low-level cognitive skills. *CBE—Life Sci Educ.* 2010;9(4):435–40.
60. Rudland JR, Golding C, Wilkinson TJ. The stress paradox: how stress can be good for learning. *Med Educ.* 2020;54(1):40–5.
61. Lee J, Jeong HJ, Kim S. Stress, anxiety, and depression among undergraduate students during the COVID-19 pandemic and their use of mental health services. *Innov High Educ.* 2021;1–20.
62. Misra R, McKean M. College students' academic stress and its relation to their anxiety, time management, and leisure satisfaction. *Am J Health Stud.* 2000;16(1):41.
63. Vaidya PM, Mulgaonkar KP. Prevalence of depression anxiety and stress in undergraduate medical students and its co-relation with their academic performance. *Indian J Occup Ther Indian J Occup Ther.* 2007;39(1).

64. Medina J. Brain rules: 12 principles for surviving and thriving at work, home, and school. ReadHowYouWant. com; 2011.
65. Lederer AM, Hoban MT. The development of the American College Health Association- National College Health Assessment III: An improved tool to assess and enhance the health and well-being of college students. *J Am Coll Health*. 2020;1–5.
66. Pate A, Lafitte EM, Ramachandran S, Caldwell DJ. The use of exam wrappers to promote metacognition. *Curr Pharm Teach Learn*. 2019;11(5):492–8.
67. Hacker DJ, Bol L, Keener MC. Metacognition in education: A focus on calibration. *Handb Metamemory Mem*. 2008;429455.
68. Bang M, Medin D. Cultural processes in science education: Supporting the navigation of multiple epistemologies. *Sci Educ*. 2010;94:1008–26.
69. Bell P, Tzou C, Bricker L, Baines A. Learning in Diversities of Structures of Social Practice: Accounting for How, Why and Where People Learn Science. *Hum Dev*. 2012 Jan 1;55:269–84.
70. Fredricks JA, Blumenfeld PC, Paris AH. School engagement: Potential of the concept, state of the evidence. *Rev Educ Res*. 2004;74(1):59–109.
71. Dweck CS. Motivational processes affecting learning. *Am Psychol*. 1986;41:1040.
72. Museus SD, Ledesma MC, Parker TL. Racism and Racial Equity in Higher Education. *ASHE High Educ Rep*. 2015 Nov 1;42(1):1–112.
73. Johnson C. Teaching to the test: How schools discourage phronesis. In: *Vice Epistemology*. Routledge; 2020. p. 225–38.
74. Ravitch D. *How, and How Not, to Improve Schools*. N Y. 2020;
75. Jensen JL, McDaniel MA, Woodard SM, Kummer TA. Teaching to the test... or testing to teach: Exams requiring higher order thinking skills encourage greater conceptual understanding. *Educ Psychol Rev*. 2014;26(2):307–29.
76. Gezer-Templeton PG, Mayhew EJ, Korte DS, Schmidt SJ. Use of exam wrappers to enhance students' metacognitive skills in a large introductory food science and human nutrition course. *J Food Sci Educ*. 2017;16(1):28–36.
77. Knierim K, Turner H, Davis RK. Two-stage exams improve student learning in an introductory geology course: Logistics, attendance, and grades. *J Geosci Educ*. 2015;63(2):157–64.
78. Wieman CE, Rieger GW, Heiner CE. Physics exams that promote collaborative learning. *Phys Teach*. 2014;52(1):51–3.
79. Hodges LC. Group exams in science courses. *New Dir Teach Learn*. 2004;2004(100):89–93.
80. Wiggins BL. The Public Exam System: Simple Steps to More Effective Tests. CourseHero Faculty Club [Internet]. 2019 Aug 6; Available from: <https://www.coursehero.com/faculty-club/classroom-tips/benjamin-wiggins/>
