1 **Public exams may decrease anxiety and deepen critical thinking**

2  
3  
4  
5  
6  
7

Wiggins, Benjamin L.<sup>1,2\*</sup>; Lily, Leah S.<sup>2,3†</sup>; Busch, Carly A.<sup>4†</sup>; Landys, Mèta M.<sup>5†</sup>; Shlichta, J. Gwen<sup>6†</sup>; Shi,  
Tianhong<sup>7†</sup>; Ngwenyama, Tandi R.<sup>8†</sup>

- 8 <sup>1</sup> Department of Biology, Shoreline Community College, Shoreline, WA (USA)  
9 <sup>2</sup> Department of Pharmacology, University of Washington, Seattle, WA (USA)  
10 <sup>3</sup> Department of Biology, Western Washington University, Bellingham, WA (USA)  
11 <sup>4</sup> School of Life Sciences, Arizona State University, Tempe, AZ (USA)  
12 <sup>5</sup> Department of Integrative Biology, Oregon State University, Corvallis, OR (USA)  
13 <sup>6</sup> Department of Biology, Edmonds College, Edmonds, WA (USA)  
14 <sup>7</sup> Ecampus Division, Oregon State University, Corvallis, OR (USA)  
15 <sup>8</sup> Carlson College of Veterinary Medicine, Oregon State University, Corvallis, OR (USA)

16 \*Corresponding author email: [benlwiggins@gmail.com](mailto:benlwiggins@gmail.com) [updated email will be available soon]

17  
18  
19 †These authors contributed equally to this work.

20  
21  
22  
23  
24  
25  
26  
27

28 **Abstract:**

29 Assessment methods across post-secondary education are traditionally constrained by logistics,  
30 built on prior practice instead of evidence, and contribute to the widespread inequities in  
31 education outcomes. As part of attempts to improve and diversify the methods used in  
32 assessment, the authors have developed a flexible and low-tech style known as ‘public exams’  
33 based in best practices. Public exams attempt to bring students authentically into the process of  
34 assessment through the use of pre-released portions of the exam. Through an initial mixed-  
35 methods research endeavor at a closely-matched pair of a research-intensive university and a  
36 community college classroom, we observe signals of positive impact from the public exam on  
37 student experiences. Public exams appear to prompt deeper thought, direct students more  
38 efficiently to the core concepts in the discipline, and may decrease anxiety in and around  
39 exams. The public exam experience does not show evidence for exacerbating gaps in exam  
40 outcomes for students from minoritized backgrounds. This evidence suggests that public exams  
41 are worth deeper investigation as an evidence-based and effective assessment style.

42

43

44

## 45 **Introduction:**

46 High-stakes examination-based assessments (hereafter, exams) are a common and  
47 widespread feature of postsecondary education (Stobart & Eggen, 2012). Whether used to give  
48 formative feedback to students, to summatively assess students' knowledge, to create selection  
49 barriers for capacity-constrained programs or careers, or simply to assign grades for external  
50 use, these exams are complex structural elements that students must grapple with (Wideen et  
51 al., 1997). Problematically, the educational practices used widely in college and universities are  
52 often based in traditional routines and logistical concerns instead of evidence-based, student-  
53 centered practices (Ambrose, 2010; Handelsman, 2006). Improving the practices in giving and  
54 taking exams has the potential to improve the educational experience for a more diverse,  
55 deeper, and more talented pool of future students (Intemann, 2009; Ralph et al., 2022).

56  
57 The choices that college faculty make around course assessment methods have profound  
58 impacts on students. Within a highly unequal power relationship, students have little to no voice  
59 about the ways in which they should be assessed. Students for whom college practices are new  
60 (to them, or to their communities) are figuring out the rules of the game on the fly; those rules  
61 change between classrooms. The same challenges that multilingual learners experience in  
62 monolingual classrooms play out (with higher stakes) during an exam. Anxiety around education  
63 can be exacerbated by exams and this anxiety tends to impact groups of students unjustly.  
64 Students from a wide array of diverse backgrounds find their progress metered by exam  
65 challenges that are designed by a professoriat that is rarely as diverse as they are (Hurtado,  
66 2007). Because strategies and tactics change in meaningful ways even between closely  
67 matched practitioners, there is a wide range of experiences that a student might encounter even  
68 within a single institution or unit. Faculty are under constant pressure to use time effectively, and  
69 many evidence-based practices require significant investments of time, energy and training that  
70 are rarely valued at the same level as research achievements or ratings of other aspects of  
71 teaching (Rossing & Lavitt, 2016). The traditional style for postsecondary education is to reveal  
72 assessment tasks to students only during the exam itself. While a dynamic mix of active  
73 learning principles have become more widespread, similar best-practices in giving college  
74 exams are less-well defined and relatively difficult to adopt even for the most conscientious of  
75 instructors.

76  
77 There are many ongoing attempts to improve the practices around exams, though largely at the  
78 practitioner level and less often codified in research literature. Our contribution is an interrelated  
79 set of evidence-based practices collectively described as the public exam system. While public  
80 exams are based in best practices well-known in education, here we describe the  
81 implementation and research findings that result. In this work, we take a lens of educative  
82 assessment: a theoretical framework summarizing that assessments have many purposes but  
83 the primary among them should be as a tool for facilitating student learning (Buxton et al., 2013;  
84 Fink, 2003; Jönsson, 2008; G. Wiggins, 1998, 2011). Specifically, educative assessment  
85 suggests that educators can create challenging exams for students that are useful practice for  
86 their careers and lives such that teaching directly to these exams will be beneficial. Our  
87 methodology follows a design-based tradition in which education interventions are implemented  
88 and researched dynamically and iteratively, and that each of our model organisms is a human

89 being in a crucial, formative part of their life. To explore our research questions rigorously, we  
90 apply mixed quantitative and qualitative methods and attend to signals in the data that  
91 triangulate similarly across multiple types of investigation. Our goal in this work is to  
92 demonstrate how public exams impact college students.  
93

#### 94 ***What is a public exam?***

95 Public exams have three elements that attempt to address three common problems:

- 96 • Partial exam content is pre-released to students prior to the exam to deepen the thinking  
97 that students can accomplish during the actual assessment. This allows students to read meta-  
98 information about their tasks beforehand as well as to engage with content that might take  
99 more time to comprehend than is available in a traditional exam. Traditionally, exam content is  
100 often encountered all at once in the context of the exam, and this rapid transmission of large  
101 amounts of relevant information constrains the asking of interesting and higher-order cognitive  
102 exam questions due to the high cognitive load (Sweller, 2010). Throughout the manuscript, we  
103 use the term "deepening thought" to refer to this aspect of public exams.
- 104 • Pre-released exam content provides opportunities for students to edit much of the exam.  
105 Language barriers around exam content are hard to disassociate from true struggles with  
106 content. By allowing students an opportunity to give feedback on exam formats and wording,  
107 we leverage a larger group of motivated editors to address challenges that are separate from  
108 conceptual knowledge. These same developing experts can also contribute to the writing of the  
109 exam itself. Traditional, surprise-based exams cannot be co-created and the experience of  
110 power relationships and secret information can detract from positive student-teacher  
111 relationships that are crucial to maximizing learning. Whether by improving language,  
112 increasing transparency, or by utilizing students as exam question creators, we hope to draw  
113 students authentically into the creation of their own assessments. Throughout the manuscript,  
114 we use the term "language barriers" to refer to this aspect of public exams.
- 115 • Lastly, the pre-released material gives a direct conduit for instructors to amplify the parts  
116 of course material that are most important. Instead of indirectly indicating core concepts  
117 through study guides or practice exams or review sessions, students are given strong cues in  
118 the actual exam about the concepts and skills that are core to the discipline and that they are  
119 expected to master. We use the term 'core concepts' here to broadly describe the content that  
120 instructors believe is more central to the practice of their discipline. Traditional surprise-based  
121 exams can only do this after the fact, at which point the opportunity to direct optimal study is  
122 generally lost. Throughout the manuscript, we use the term "directing to core concepts" to refer  
123 to this aspect of public exams.

124

125 As a simplified example, imagine an exam question in which the student is directed "For ten  
126 points, explain in three sentences or less how detoxification of human blood is performed by the  
127 cells in the liver." By pre-releasing the exam question for students but withholding only the word  
128 'liver', the possible variants of the exam question are increased to include at least several  
129 organs. While providing the meta-information for the task as well as the framing of the topic area

130 itself, this question maintains enough surprise to deeply examine student understanding. A  
131 further variant of a pre-released exam question might be: “For ten points, explain in three  
132 sentences or less how [withheld] of human blood is performed by the cells in the [withheld].” By  
133 withholding just a single additional word, students are now given direct information about both  
134 the method/scope of written assessment as well as tangible evidence that their understanding of  
135 processes impacting human blood will be crucial for demonstrating mastery of the topic.

136 A timeline comparison of a public exam and a traditional exam is shown in Figure 1.  
137

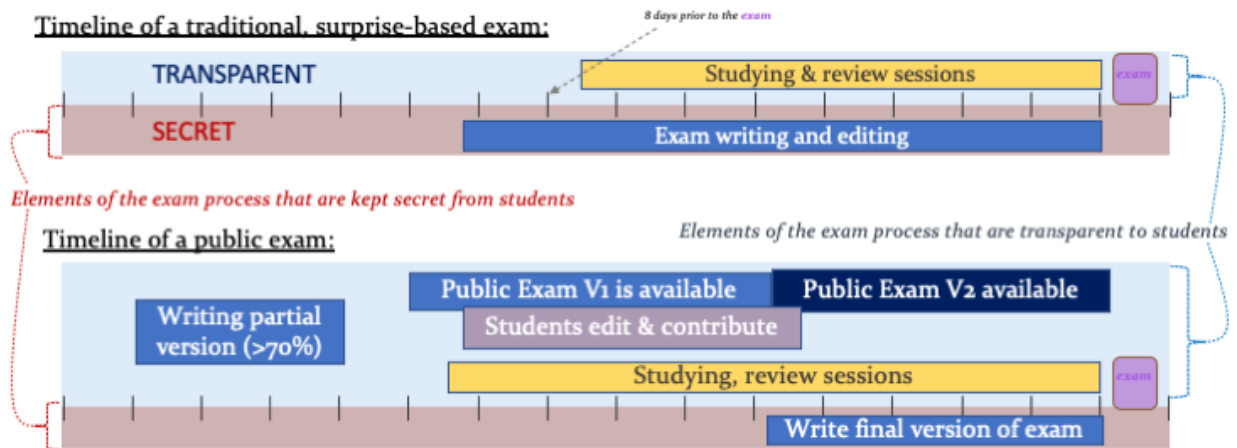

138  
139 **Fig 1. Comparative timeline of traditional and public exams.**  
140 *Tasks to be completed are separated into those that are transparent to students and those that must necessarily be kept*  
141 *secret from students at the risk of giving away exam answers. For readers unfamiliar with traditional exams, the top*  
142 *timeline is offered as an approximation. The bottom timeline is an approximation of a public exam structure. The purpose*  
143 *of this figure is to illustrate the differences in increased transparency and opportunities to study from exam material in*  
144 *public exams.*

145  
146  
147 The underlying goal in these three elements of public exams is to engender trust and authentic  
148 engagement between students and instructors. Throughout the manuscript, we use the term  
149 "authentic involvement" to refer to aspects of public exams that address this overarching theme  
150 relating to trust (Brown, 2017). The four evidence-based practices described above are  
151 frequently addressed throughout K-12 education and are useful in convincing students more  
152 often that the assessment process can work for them (Darling-Hammond & Bransford, 2005; R.  
153 Keith. Sawyer, 2005; Zeichner et al., 2000). A few types of examples of public exam questions  
154 are presented in Figure 2. Because students and classrooms differ so greatly, the use of the  
155 public exam style is not intended to be narrowly prescriptive. Instead, we offer this stylistic  
156 definition of public exams in order to a) help guide instructors incrementally closer to more  
157 engaging assessments and b) provide a basis for exploratory research to identify impacts on  
158 and benefits for postsecondary students.

159

## Examples of public exam questions:

**Public Version of 1)** Three molecules are interacting with each other through the formation of three hydrogen bonds. Draw three possible hydrogen bonds with dashed lines. Make the relevant partial charges clear. The three molecules are water, alanine, and [withheld].

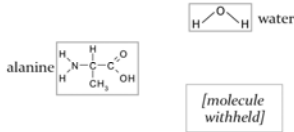

**On the final version of #1:**  
[withheld] *acetic acid*  
Changed to: 

**Public Version of 2)** How would platelet production change if [change to the platelet system withheld]?

- A. Many fewer platelets would be produced
- B. Many more platelets would be produced
- C. The same number of platelets will be produced
- D. [answer choice withheld]

**On the final version of #2:**  
[change to the platelet system withheld] if TPO was degraded rapidly  
Changed to: Platelets would be produced, but they will not be functional  
[answer choice withheld]

**Public Version of 3)**

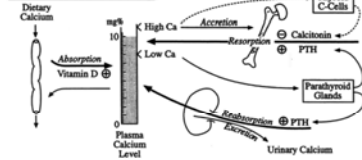

The calcium regulation system shown here is largely independent of control by the nervous system. What is one possible advantage of this?

- A. [Answer choice withheld]
- B. [Answer choice withheld]
- C. [Answer choice withheld]
- D. [Answer choice withheld]

**On the final version of #3:**  
'Answer choice withheld's became:  
A. Bones do not have much contact with other kinds of cells besides osteoblasts and osteoclasts  
B. Neurons can only increase the action of another cell, so they would be useless when calcium is high  
C. Bone density can be independent of calcium levels  
D. Neurons rely on calcium, so they may not be reliable effectors when calcium is low

**Public Version of 4)** In the fictitious prokaryote below, some of the genes on the single circular chromosome are shown along with their gene products. Central dogma transitions are shown in solid arrows, promoter sequences are indicated with a 'P' and a curved arrow, and protein interactions are shown by dashed arrows. The SercPlus operon is generally associated with the bacterial behavior observed when the bacteria has arrived at a new, rich food source. The Serc1 channel facilitates diffusion of a wide range of nutrient molecules into the cell. Protein Q has a role in rapid cell crawling. This system functions in ways that are conceptually similar to well-studied parts of the lac operon in *E. coli*. [Question withheld]

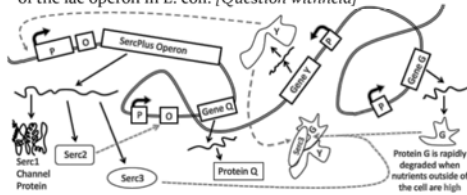

**On the final version of #4:**  
[Question withheld] changed to:  
Design or diagram a reasonable way in which the G1 checkpoint would interact with this system to ensure that the cell will not enter S-phase while the cell is rapidly crawling. Be specific about which molecules are interacting, and in what ways.

160

161 **Fig 2. Examples of public-style exam questions.**

162 For each of 4 exam questions, the pre-released version provided to students well before the exam is shown. In dashed  
163 insets are the changes made to the question for the actual version that students complete for course points. The purpose  
164 of this figure is to give examples of a few of the types of exam questions that can be used in public exams.  
165

## 166 Pedagogical Framework

167 Pedagogical frameworks that support the practice of public exams as described above include  
168 cognitive load theory (Sweller, 2010), retrieval practices (Moreira et al., 2019), active learning  
169 (Bonwell & Eison, 1991), pedagogy of care (McMullen et al., 2015), and inclusive pedagogy  
170 (Florian & Black-Hawkins, 2011). When students engage with an exam, they are retrieving  
171 information from long-term memory into working memory in order to answer a test question. If  
172 the exam questions are unfamiliar to students, do not match what was taught, or have unclear  
173 instructions, students are likely to experience cognitive overload (McMullen et al., 2015), and  
174 ultimately a negative impact on their academic performance. In public exams, giving students

175 opportunities to practice exam-relevant skills in similar formats and on similar content is a  
176 solution aiming to reduce cognitive load and, ultimately, test anxiety. Another effect of giving  
177 students opportunities to practice exam-relevant skills is utilizing the benefits of retrieval practice  
178 to achieve mastery learning. Researchers define active learning as “instructional activities  
179 involving students in doing things and thinking about what they are doing” (Ambrose, 2010;  
180 Bonwell & Eison, 1991; Moreira et al., 2019). Allowing students to engage with and edit the pre-  
181 released exam applies the principles of active learning. Public exams give students  
182 opportunities to lessen potential cultural barriers or linguistic barriers to a full understanding of  
183 the exam questions, aiming to create an inclusive learning environment for all students.  
184 Pedagogy of care is defined as “a teaching practice based on reciprocity where teachers take  
185 on the role of caregiving and students receive care on the basis of the teachers’ concern for  
186 their overall well-being” (Obuaku-Igwe, 2021). Public exams apply pedagogy of care by  
187 attending to students’ emotional stress related to test anxiety. Inclusive pedagogy is the  
188 application of the diversity and inclusive social movement into education, and is a student-  
189 centered approach to teaching and learning that supports learners of all backgrounds (Shi &  
190 Blau, 2020). The public exam style is designed to align with evidence-based research on best  
191 practices in assessment.

192  
193

#### 194 **Research Questions:**

195 Our research questions are the following:

- 196 • In what ways do public exams impact the student experience?
  - 197 ○ Are these impacts negative or positive?
  - 198 ○ Are these experiences impacted by Language issues, Directing to core  
199 concepts, Deepening thought, and/or Authentic engagement?
- 200 • Do public exams impact grade equity?
- 201 • Are public exams likely to be applicable across postsecondary education contexts?

202  
203

204 In summary, exams are a widespread and problematically complex aspect of the college  
205 experience. Public exams are designed around best practices in education, but the combined  
206 application of these methods has not been rigorously studied. We apply mixed-method design  
207 research to understand how and for which students public exams can impact their educative  
208 experiences in college courses.

#### 209 **Methods:**

210 *Research environments:*

211 Research was conducted at a research university (R1) and a community college (CC) in  
212 the Pacific Northwest of the United States. Students were enrolled in lower-division courses in  
213 Biology departments during Quarter 2 of 2021. The R1 course was taught for 300 students and  
214 the CC course was taught for 48 students from which populations of 292 and 32 participants,  
215 respectively, were included through IRB-approved consent processes (under protocol #s

216 STUDY00012237, ECIRB-20210512 and IRB-2020-0813). These courses were chosen for  
217 consistency of general topic and level, for the large population in the R1 course which allowed  
218 quantitative analysis of subgroups, and for institutional access to research. Students in the  
219 R1/CC courses were 63%/59% non-white, 77%/66% registrar-identified female, 24%/20% first-  
220 generation attending college, 12%/24% international and (at the R1) 31% identified as being  
221 from historically underserved populations by the R1 university. Students in both courses  
222 typically have interest in a wide range of career goals around healthcare, science, research and  
223 business. Public exam techniques were used in both courses. Both the CC and R1 courses  
224 were using public exams for the first time in those environments. In the large R1 course,  
225 students were graded largely on the basis of 5 total exams given every 2 weeks throughout the  
226 10-week quarter. In the smaller CC course, students completed a total of two exams that were  
227 written in the public exam style.

228

#### 229 *Research flow:*

230 This work was conducted using a design-based research methodology, which allows for  
231 preliminary research findings to be used to guide the collection and analysis of subsequent data  
232 in an iterative fashion (Collins et al., 2004). Examining human experiences in this methodology  
233 is intended to be more rigorous than simple, self-reported data while allowing a greater breadth  
234 of possible findings than quantitative experiments alone would observe. This methodology is a  
235 good fit for education systems where iterative redesign and incremental improvement of human  
236 experiences are the primary goals of research and implementation work (Sandoval, 2004).

237 Here, we used *qualitative interviews* to broadly assess the experiences of students  
238 taking public exams around our three main research questions. Interviews were also used to  
239 assess differences in the student experience between institutions. These interview findings  
240 refined our analysis of a larger data set by *coding open-ended survey items*. In parallel to this  
241 qualitative and mixed-method work, students in the R1 course took exams that used both public  
242 and traditional questions to experimentally observe signals of inequity in exam outcomes. This  
243 *within-exam experimental system* controls for student identity, instructor impact, classroom  
244 environment, and content material in comparing data from two types of assessment questions.  
245 This *quantitative data collection and analysis* is intended to cast a wide net for possible negative  
246 impacts or inequities of public exams on student experiences. Any positive impacts of the public  
247 exam system that are observed are likely to be conservative because of issues with first-time  
248 implementation fidelity (in both R1 and CC courses) and incomplete application of the public  
249 exam system (in the R1 course). *Student self-reported preferences* for exam style were  
250 collected for triangulating with other types of data; this self-reported data may help to illuminate  
251 the presence of unknown negative impacts of the intervention, but is not in itself convincing of  
252 positive impacts of the intervention. The overall process of data collection is described below in  
253 Figure 3. The purpose of collecting a wide range of types of data is to broadly investigate the  
254 possible outcomes from this intervention and better understand the possible avenues for future,  
255 deeper research investigations. Here we present the results of this initial design-based research  
256 study.

257



### Data collection in Spring quarter of 2021:

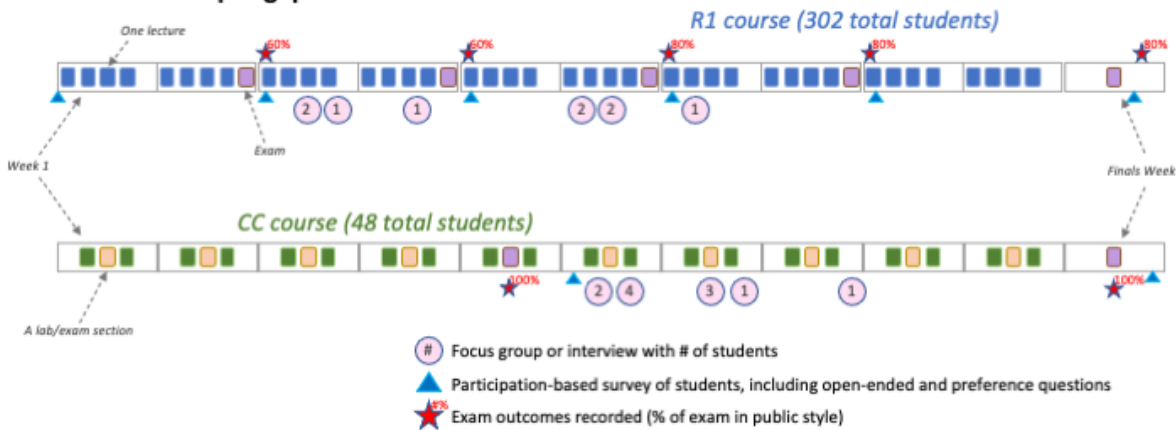

258

259

Fig 3. *Data collection scheme.*

260

*The purpose of this figure is to make clear when and in which class environment the data were being collected.*

261

262

263

#### *Qualitative interviews:*

264

Facilitation of interviews and transcription were completed by an experienced qualitative researcher (LSL) who has an M.Ed. in Curriculum and Instruction, was a Research Assistant on the project, has experience in clinical psychology, and has prior publications using qualitative coding and interview research in education (Dahlberg et al., 2019; B. L. Wiggins et al., 2017, 2021).

269

Group and individual interviews were used to hear student experiences using grounded ethnographic principles (Glaser & Strauss, 1968; Rubin, 2012) and with subject-centered and -driven methodology from dialectical behavioral therapy (Linehan, 2018). Eleven interviews totalled 488 minutes of recorded discourse with 19 participants. Student participants were recruited to participate via random email to course lists. Interviewer non-affiliation with the courses was communicated and students were given a small Starbucks card for participating in the Zoom interview. Participants did not know the interviewer prior to the interview process. Data around the interviews at both sites as well as all transcripts are available in [Supplement 1](#).

277

During qualitative interviews, broad experiential opening questions were used (e.g. "How is [course] treating you?") to elicit a broad spectrum of conversations around students' experiences (Cameron, 2005). Rather than bringing in specific questions or prompts, the facilitator followed up with probing questions on student-raised topics pertaining to our research questions. Opportunities to segue organically into these discussions were taken using light reinforcement and broad questioning (Rubin, 2012). This method enabled us to influence the focus of discussion without disclosing our specific research methods or interests, which permits students to consider their impressions of the course and content within their own framework of values, memories, and needs. Anonymized transcripts of recorded conversations were analyzed afterwards, and participants did not give feedback on the findings. Thematic representation saturated (Saunders et al., 2018) at the R1 site after 6 interviews, so interviews at this site were discontinued.

288

289 Transcripts of qualitative interviews were analyzed by coding of statements. Initially, we  
290 prioritized the following four themes drawn from our original research question: 1) Language  
291 issues, 2) Directing to core concepts, 3) Deepening thought, and 4) Authentic engagement  
292 (coded as numbered here). We decided to investigate these four themes due to anecdotal  
293 discussions with students in prior courses, and these themes were prevalent in research  
294 interviews. While several original themes appeared to be less frequently encountered and were  
295 dropped from the final analysis, other themes emerged from qualitative analysis. The new codes  
296 5) Anxiety or Confidence and 6) Collaboration emerged during iterative qualitative analysis of  
297 interviews with students at the CC and R1 institutions, where students strongly expressed the  
298 importance of these themes. Lastly, a final code 7) Not Related to the Public Exam System was  
299 designed to capture student experiences that were not part of the public exam system. The  
300 descriptive language found in the coding tables was iteratively improved for clarity and to better  
301 match student language. Transcripts were subsequently re-coded by BW and LSL using this  
302 improved set of seven codes. The research team discussed coding with a lens towards  
303 observing possible differences in experience between the institution types throughout the  
304 design-based process. The final consensus coding table for interviews with exemplary quotes is  
305 available in [Supplement 2](#).

306

#### 307 *Coding of open-ended survey items:*

308 Open-ended survey items were used as a quantifiable source of qualitative data at scale.  
309 In a participation-only study, all students at both sites were asked to answer the question: "*Did*  
310 *the style of exams in [this course] work for you? Why or Why not?*". Cognitive testing for validity  
311 of this question was performed with a separate group of students that were of the same age and  
312 progression as students at the CC and R1 sites. Four student participants were involved, and all  
313 were of sophomore/junior standing. Student participants were randomly recruited by email from  
314 a large list of similarly matching biology students. The goal of this cognitive testing was to  
315 identify any problematic interpretations of this question that had been previously vetted through  
316 iterative writing and editing. Cognitive testing was facilitated by BW. Students read the question  
317 in paper form and then afterwards worked as a group to read the question aloud, come to a  
318 consensus meaning, and then discuss any possible alternative interpretations. No significant  
319 confusions or alternative meanings were described. BW and LSL discussed all interpretations  
320 and concluded that the final wording of this question was understood by all participants and  
321 likely to be valid for the research population. Responses to the final version of this open-ended  
322 survey question were collected and anonymized from 242 participants at the R1 site and 32  
323 participants at the CC site.

324

325 Open-ended survey responses were qualitatively coded. The final seven thematic codes  
326 used were developed and improved as described above. The seven final codes were iteratively  
327 coded and discussed and then coded for presence in the larger survey-based set of 242 open-  
328 ended responses by LSL and BW. Each code was also sub-coded as positive or negative with  
329 regards to literature-based learning outcomes for students. This was not opinion-based coding  
330 on the part of students, but rather researcher-based assessment of whether the practices or  
331 experiences presented were positive or negative based on educational best practices as

332 described in national best-practices texts including How People Learn II (National Academies of  
333 Sciences, 2018) and the biology-focused AAAS document Vision and Change (AAAS, 2011a).  
334 In other words, these results were not coded for what students enjoyed or appreciated (see  
335 examples in-text below) but rather for conditions in which learning is likely to be supported. Two  
336 researchers (BW and LSL) independently coded 15% of the responses and achieved an  
337 acceptable interrater reliability score of  $\kappa = 0.88$  (McHugh, 2012). One researcher (LSL)  
338 coded the remaining responses.

339  
340 For examples of the positive or negative coding, a student who indicated “*The public*  
341 *exam made it harder to know what I needed to know*” would be coded into the category of  
342 ‘Directing to core concepts’ and as a ‘Negative’ impact, since confusion about core concepts is  
343 a problematic distractor for learning across fields (Meyer, 2004; National Academies of  
344 Sciences, 2018; R. Keith. Sawyer, 2005). If a student indicated that they “*hate public exams*  
345 *because they force me to think more deeply,*” then this would be coded as a ‘Positive’ impact  
346 within the theme of ‘Deeper thought’, even though the student may not have enjoyed that aspect  
347 of the learning challenge. Further examples and final codes are available in Supplement 3.

348 To determine if the prevalence of any codes was significantly impactful on student  
349 experiences, we calculated the percent of students who provided feedback on each qualitative  
350 theme of the public exam system in the open-ended survey items and whether that feedback  
351 was positive or negative. To determine if there was a relationship between the type of feedback  
352 students provided (i.e., about the public exam system or not) and the nature of that feedback  
353 (i.e., positive or negative), we conducted a series of Pearson’s chi-square tests of independence  
354 for each of the six factors of the public exam system as well as an aggregate of all six factors.  
355 This approach used Code 7 (‘Not related to the Public Exam System’) as a control group, which  
356 is more conservative than a simple control ratio like 1:1 and controls for the likely general  
357 tendency for participants to report positive experiences more often than negative experiences.  
358 When a given count in the contingency table was too small (i.e., less than five) to conduct a chi-  
359 square test, we used a Fisher’s exact test (Bower, 2003; McCrum-Gardner, 2008).

360

361 *Within-exam experimentation:*

362 Within the large R1 course, students completed five summative exams in which  
363 assessment questions were a mix of traditional ‘surprise’ style exam questions for which they  
364 had no pre-knowledge and other ‘public’ style exam questions for which students had exposure  
365 to much of the information in the individual question well before the time of assessment. For this  
366 course, all exam questions were written in multiple choice format. The relative amounts of  
367 traditional or public exam questions changed throughout the course. Students began the quarter  
368 with two exams that used the same distribution of multiple choice exam questions: 15 public-  
369 style exam questions and 10 traditional, surprise-style exam questions. Subsequent exams (in  
370 response to student survey responses, see discussion) included 20 public-style exam questions  
371 and 5 traditional, surprise-style exam questions. The purpose of this within-exam  
372 experimentation is to collect well-controlled data that might lead to the observation of any  
373 inequities in this style of assessment, should they exist, rather than to prove any particular value  
374 of an assessment style. Because the variation between assessment styles happens within each

375 exam, data collected about exam outcomes can be compared on the same scientific topic  
376 areas, for the same student identities, and with the same instructor among other variables that  
377 are otherwise difficult to control.

378

379 *Quantitative data collection and analysis:*

380 Within the large R1 course, the following discrete data were collected for each participant:  
381 College GPA, course grade, exam results for each question on each exam, scores for  
382 participation-based assignments, completion or not of an exam editing activity, and (via the  
383 university registrar) race/ethnicity, gender, international student status, first-generation in  
384 college status, and inclusion in the university-assigned Education Opportunity Program (EOP).  
385 This last categorization is particularly important to this work: the R1 institution defines “under-  
386 advantaged” students as students identified as part of the EOP and these students hail from  
387 educationally or economically disadvantaged backgrounds. Because this EOP categorization is  
388 based on family income and other variables not typically represented in simpler demographic  
389 statistics, we chose this measure as the single variable on which we would pre-build models for  
390 analysis as has been used in other, similar work (Freeman et al., 2017; Wright et al., 2016).  
391 These data were collect in order to analyze quantitative data in a way that would make  
392 observation of any inequitable outcomes of the intervention more likely. All data collected in  
393 these ways are available in anonymized form in [Supplement 4](#).

394 A primary purpose of quantitative data was to observe any inequities in the assessments  
395 that might exist. In order to determine if students performed differently on public or traditional  
396 exams, we used a two-sample t-test to compare the total percentage of points students earned  
397 on all public exam questions and all traditional exam questions throughout the term.  
398

399 In order to determine whether there were differences in exam performance on each type  
400 of exam question based on students’ demographic characteristics, we used linear regression  
401 models and included gender (male/female), EOP group of interest (yes/no), and overall GPA  
402 (from the registrar on a 4-point scale) as predictors. (Example model: percent score on public  
403 exam questions ~ gender + interest group + GPA.) Gender has been shown to affect student  
404 exam performance (Odom et al., 2021) and students in our EOP group of interest have been  
405 found to do worse than their peers on exams at this institution (Cooper et al., 2020). We  
406 acknowledge that registrar data for gender that includes only male/female do not best represent  
407 all individuals’ gender identity and that not every person identifies in the gender binary (Cooper  
408 et al., 2020), but we did not ask students to self-report their gender.  
409

410 To examine potential demographic differences in students’ self-reported preferences for  
411 the proportion of each question type on an exam, after the second and third exams, we asked  
412 students if they would prefer to have more public questions, fewer public questions, or keep the  
413 same ratio of public to traditional questions for future exams. After the fourth exam, we asked  
414 students if they would prefer more or fewer public questions with no neutral option. We  
415 calculated the percentage of students who selected each option and assessed potential  
416 demographic differences of students’ preferences after the second and third exams using

417 multinomial regressions and using logistic regression for preferences after the fourth exam. We  
418 again included gender (male/female), EOP group of interest (yes/no), and overall GPA (based  
419 on registrar data on a 4-point scale) in our models. (Model for post-exam two and three  
420 preferences: exam preference (more public/fewer public/same) ~ gender + interest group +  
421 GPA; model for post-exam four preferences: exam preference (more public/fewer public) ~  
422 gender + interest group + GPA.)

423

424           Preceding each exam, students were given the opportunity to provide edits on the public  
425 portion of the exam. This was an optional part of a required online assignment which students  
426 were able to bypass and still receive full participation points. To investigate the extent to which a  
427 student providing edits on the exams might have impacted their overall course grade, we used a  
428 linear regression with the total number of exams for which the student provided edits, EOP  
429 group of interest (yes/no), and overall GPA as the predictors in our model. (Model: course grade  
430 ~ total edits + interest group + GPA.)

431

432

433

434 **Results:**

435 *Qualitative interviews:*

436 Interview-based methods were used to guide the overall flow of research. Interview  
437 transcripts were used to allow for the emergence or loss of code themes in response to student  
438 experiences, and Codes 5 and 6 ('anxiety or confidence' and 'collaboration') were added to the  
439 coding table. Interviews were also used to iteratively improve research questions and codes,  
440 including cognitive testing of an open-ended survey question.

441  
442 To better understand whether public exams might be applicable to community college  
443 courses, which are generally smaller and less available to quantitative research, we undertook  
444 qualitative interviews in a closely-matched community college course. This CC course closely  
445 matched the R1 course in terms of topic, location, timeline, and the first-time use of the public  
446 exam style for the course. Comparing two environments through qualitative interviews is an  
447 inexact method, but it is a rigorous way to explore broadly for signals that there are substantial  
448 important differences in either the environment or the intervention. In this case, analysis through  
449 iterative coding of interview transcripts brought us to the conclusion that students in the two  
450 courses had similar experiences with public exams. Our primary codes were evident in similar  
451 proportions, and student comments to interviewers brought up similar challenges and gains. No  
452 thematic signals appeared to us in one environment and not the other. This is an initial attempt  
453 to explore the possible broad application of public exams, and clearly more research will be  
454 required on a greater scale to make similar conclusions. In the meantime, the outcomes of  
455 these analyses are consistent with public exams being similarly applicable across these two  
456 institution types.

457

458

459 *Coding of open-ended responses:*

460 Students in the large R1 course answered a survey item: "*Did the style of exams in [the*  
461 *R1 course] work for you? Why or Why not?*". All coding data for open-ended survey items is  
462 available in [Supplement 5](#). When compared with a conservative control group using Code 7  
463 ('Not part of the public exam system'), we observed a strongly significant statistical signal for the  
464 overall positive impacts of public exams (Table 1, Row 1). No significance (positive or negative)  
465 was observed for student mentions of language barriers, authentic involvement in the process of  
466 assessment, or collaboration. Student experiences with 'Directing to core concepts' were  
467 significantly positive ( $p$  value = 0.0002). Student experiences with 'Deeper thought' were also  
468 significantly positive ( $p$  value = 0.004). Student experiences with 'Anxiety' were strongly,  
469 significantly positive ( $p$  value = 0.0101). Positive or negative experiential impact showed no  
470 statistical difference for students in the EOP group. These data suggest that students'  
471 unprompted experiences with public exams are predominantly positive, which correlates well  
472 with preference data described below. These data also triangulate well with interview results  
473 noting that deeper cognitive work, decreased anxiety, and more efficient directing to core  
474 concepts are likely outcomes of public exams. These results of the quantitative analysis of  
475 open-ended coding are presented in Table 1.

476

477

|                                                                 | <i>Signal Pos:Neg</i> | <i>Null Pos:Neg</i> | $\chi^2$ <i>Test Statistic</i>                                         | <i>P value</i> |
|-----------------------------------------------------------------|-----------------------|---------------------|------------------------------------------------------------------------|----------------|
| <i>Overall Impacts of Public Exams</i>                          | 97:22                 | 74:38               | 7.1547                                                                 | 0.0075         |
| <i>Language barriers</i>                                        | 9:9                   | 74:38               | 1.7353                                                                 | 0.1877         |
| <i>Authentic involvement</i>                                    | 11:4                  | 74:38               | 0.3152                                                                 | 0.5745         |
| <i>Collaboration</i>                                            | 13:0                  | 74:38               | Cannot run test with a zero result.<br>Does not approach significance. |                |
| <i>Directing to core concepts</i>                               | 55:5                  | 74:38               | 13.6508                                                                | 0.0002         |
| <i>Deeper thought</i>                                           | 27:2                  | 74:38               | 8.2834                                                                 | 0.0040         |
| <i>Anxiety</i>                                                  | 31:4                  | 74:38               | 6.6150                                                                 | 0.0101         |
| <i>Results are different for students in minoritized groups</i> | 24:9                  | 19:15               | 2.0669                                                                 | 0.1505         |

478 **Table 1. Results of coding of open-ended survey items.**

479 *Instances of codes are tabulated from open-ended survey item responses from 242 students in the R1 environment. In*  
 480 *each entry for Signal (Column 2) and Null (Column 3) the occurrences are presented as*  
 481 *'PositiveInstances:NegativeInstances'. The Null ratio of codes used as a control is taken from all codes not related to*  
 482 *features of the public exam for the same population of students. Significance tests compare Signal ratios to Null ratios*  
 483 *(which are themselves conservatively more positive than 1:1) using a Chi-squared test statistic. The purpose of this table*  
 484 *is to show which codes were found to have statistically significant presence in students' unprompted self-reported*  
 485 *experiences, and whether those codes had an impact that is likely to be positive or negative on learning.*  
 486  
 487

488 ***Within-exam experimentation:***

489 Comparisons of exam outcomes on mixed traditional/public exams were used to quantitatively  
 490 assess possible issues of equity. Student exam outcomes on public and traditional exam  
 491 questions were analyzed for two groups of students: a university-identified diverse group of  
 492 students in the Educational Opportunity Project (EOP), and the rest of the student population.  
 493 As shown in Figure 4, we observed in our model that all students performed better on public  
 494 exam questions compared to traditional exam questions (blue lines). Because of the differences  
 495 in learning processes between public and traditional exam questions, this difference in  
 496 performance is not evidence of learning differences between contents assessed in a given  
 497 method. We also observed the expected decrease in high-stakes exam scores across question  
 498 types for students from EOP minoritized groups (red lines). The combination of these trends  
 499 was consistent for students in both EOP and non-EOP groups, giving no indication that public  
 500 exam questions resulted in increasing inequity.

501  
502  
503



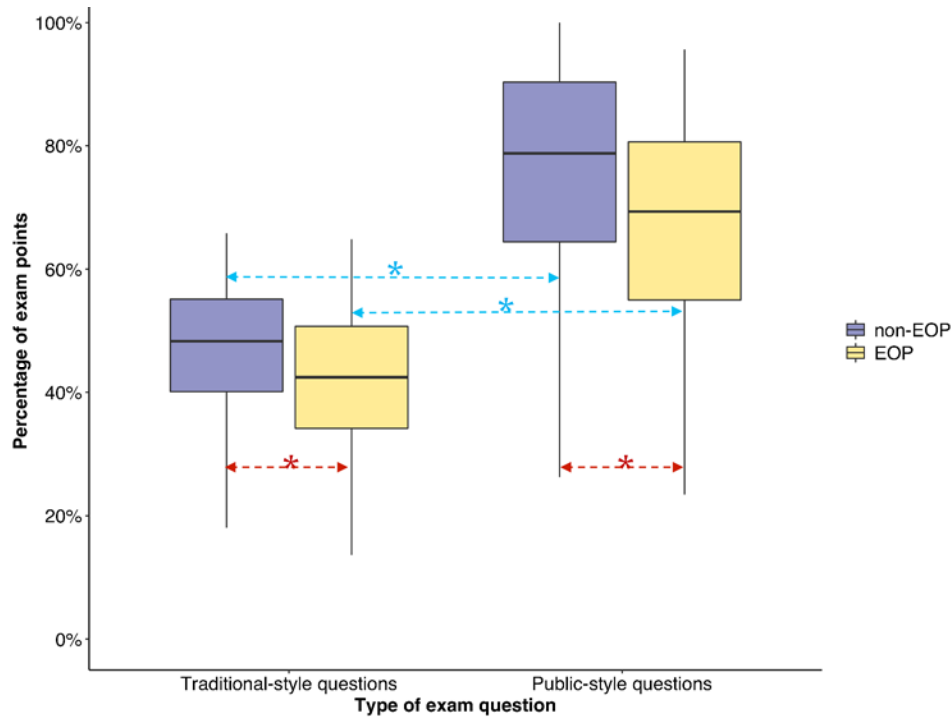

504  
505 **Fig 4. Exam outcomes for traditional- and public-style exams.**

506 Color plots are separated by underserved EOP group in yellow and non-EOP (majority) group in purple. Significant  
507 differences were found in the higher scores for students on public style exam questions as compared to traditional exam  
508 questions (indicated with blue asterisks), although the difficulty or achievement on these exam questions cannot be  
509 directly compared as the learning structures were different. Significant differences were found in exam scores between  
510 groups of students, which is consistent with pernicious gaps in outcomes in postsecondary education (indicated with red  
511 asterisks). No differences in the patterns of outcomes for traditional/public exam questions were found in either group of  
512 students, which is consistent with public exams being similarly equitable compared to traditional exams. The purpose of  
513 this figure is to display the outcomes of this experiment intended to observe any differences in equitable treatment of  
514 students if they exist.

515  
516 **Student self-reported preferences:**

517 While student self-reported data is insufficient for establishing research findings, it can  
518 be useful in broad or initial research investigations to help observe experiential problems in an  
519 intervention. Our self-reported data is presented here for completeness. In the large R1 course,  
520 students were asked about their preferences for public or traditional exam questions. After  
521 experiencing two mixed exams with 15 public and 10 traditional questions each, 41% of  
522 students preferred to keep the same distribution for future exams, 3% of students wanted more  
523 traditional questions, and 56% of students wanted future exams to have a greater proportion of  
524 public-style questions. After listening to this student voice and increasing the proportion of public  
525 questions for the following exam, students were surveyed with the same options. After this  
526 exam with 20 public and 5 traditional questions, 67% of students wanted to keep the increased  
527 20:5 distribution while 6% wanted more traditional questions and 24% wanted more than 20 of  
528 the 25 questions to be public. Course instructors kept the 20:5 ratio for the next exam, and  
529 students after this exam were given only two options so as to better understand the preferences  
530 of the majority of students. In this final survey prior to the final exam, 15% of students wanted to

531 decrease the number of public questions and 85% wanted to increase it. Throughout these  
532 exams and the overall self-reported desire for more public exam questions than traditional  
533 questions, there was no significant signal for a demographic basis on which these preferences  
534 were made, nor was preference correlated with course grade outcomes.

535

536 *Does editing of the exam impact students?*

537 As part of the public exam, students were given the opportunity to suggest edits or contributions  
538 to the public exam document itself. Three examples of the kinds of edits suggested by students  
539 were:

540 • Highlighting a grammatical error in the exam: The initial public exam had a  
541 question that ended with "...is likely to experience which of the following symptoms  
542 effects." A student responded via survey by writing "What do you mean by "symptoms  
543 effects"? Is this asking which symptoms the patient will experience?". This made clear to  
544 the exam authors that the word 'effects' was confusing and could be removed.

545 • Suggesting an improvement to the grammar in the exam: An initial public  
546 question used the word 'reasonable', and a student noted "... 'reasonable' is a subjective  
547 and vague descriptor here, leaving it open to different interpretations." The student went  
548 on to suggest that the exam writers should "...either including a more precise definition of  
549 what you mean by 'reasonable' in the question or using a different word that more clearly  
550 gets at what you are looking for in this question would make it easier to understand. For  
551 example, by reasonable do you mean 'could possibly happen' or 'is likely to happen'?"  
552 The authors used one of these suggestions in later versions of the exam.

553 • Suggesting creative text to complete a question: A public question asked  
554 students to assess the conclusions that could be drawn from a given graph on clinical  
555 outcomes for patients with diabetes. A student suggested that one of the possible  
556 answers could be "*Based on these graphs, should we be optimistic about the progress  
557 of diabetes care in the United States?*". This answer choice was not taken up as written  
558 by exam authors, but did catalyze the use of a similar incorrect answer choice for a later  
559 version: "*Based on these graphs, should we be pessimistic about the progress of  
560 diabetes care?*".

561 Students who undertook these optional, non-credit opportunities, when controlling for course  
562 grades and demographic backgrounds, were significantly more likely to perform better in their  
563 overall course grade (p value = 0.000402). This result suggests that the act of being engaged  
564 and legitimately contributing to the exam, even for non-content contributions, may help students  
565 learn the concepts. We present this interesting but relatively less-important finding for  
566 completeness.

567

568

## 569 **Discussion:**

570 We have described above an initial mixed methods research investigation on the  
571 impacts of public exams for students. Here we discuss the results in light of our research  
572 questions, as well as future research questions and limitations of this work.

573 *In what ways do public exams impact the student experience?*

574 We observed impacts of the public exam system on the student experience through  
575 analysis of three types of data: open-ended survey responses, self-reported preference  
576 surveys, and modeling of student outcomes based on a feature of student behavior around  
577 exam editing.

578 Analysis of students' open-ended survey responses showed an overall significant and  
579 positive impact of public exams on student experiences in a large STEM course. The positive  
580 impact of public exams on student experiences was significant even when controlled against  
581 other student responses in the same environment. They also triangulate well with themes from  
582 interviews, self-reported preference surveys, and with anecdotal narratives from public exam  
583 practitioners more widely. The aspects of the student experience that were significantly positive  
584 were in 1) Directing students to core concepts, 2) Deepening thought in the exam experience,  
585 and 3) Helping students to address problems around anxiety or confidence.

586 **1) Directing students to core concepts** speaks directly to a consistent challenge for  
587 novice learners. While accepting the deluge of information present in any fast-paced course,  
588 novice learners struggle to develop mental models to organize incoming information (26).  
589 Modern courses typically offer an array of learning materials to assist students in developing  
590 understanding of which pieces of information are core to the discipline and which pieces of  
591 information are facts or ideas that simply reinforce the concepts that an instructor feels are core  
592 to mastering the material in their course. Within the public exam structure, students have early  
593 access to exam materials that are directly connected to the reinforcement scheme of the course  
594 (typically, in course points). Instead of deducing core concepts from a string of lectures,  
595 assignments, study guides and other sources, students in a public exam course have the  
596 opportunity to infer value by placement (or not) on the actual assessment itself. Meta-contextual  
597 clues like the amount of exam points that can be earned can be a powerful reminder for  
598 students to study THIS skill and not THAT one. In contrast, traditional exams hide these  
599 valuable assessments until the moment of the exam itself. For students in multiple courses or  
600 studying while maintaining employment or families, efficiency in deciding which parts of the  
601 course to study can help learning and keep college work manageable. The significant, positive  
602 impact of 'Directing to core concepts' on public exams may be a reflection of these benefits to  
603 learning. In open ended responses in which students were asked "*Did the style of exams in [the*  
604 *R1 course] work for you? Why or Why not?*" students reported that having access to some part  
605 of the exam ahead of time allowed them to focus on what was important instead of feeling  
606 overwhelmed by all the content. As one R1 participant said:

607 *"...they provide me with some direction on what to study a lot for. I think that there's a*  
608 *lot of material that's covered in this course throughout the lectures, and it would be*  
609 *hard to remember every single detail from the textbook, so I think the guidance of the*  
610 *public questions really helps you to look back at that specific part in your notes and/or*  
611 *the lecture to refresh your memory on what you learned."*

612 Many instructors are frequently asked by students before exams, "What do I need to know for  
613 the exam?" Perhaps similar to some types of practice exams given before an exam, public  
614 exams were seen to provide a similar type of focus on important content.

615           **2) Deepening thought** for students was an original motivating factor in early  
616 development and implementation of the public exam style. For instructors, the ‘flattening’ of  
617 thought required by the logistical constraints in many types of assessments has been a constant  
618 source of dismay. Further research should assess directly for creativity and critical thinking, but  
619 evaluation of responses for those characteristics is daunting, especially at scale. It is possible  
620 that benefits from public exams come from the increase in higher-order exam question  
621 (Anderson & Krathwohl, 2001; Barnett & Francis, 2012; Lemons & Lemons, 2013), which was  
622 the intent of the designers but not rigorously assessed in this study. The significant, positive  
623 benefits from the public exam style may be due to shifting exam-provoked thought from a one-  
624 time performance into a longer and more collegial set of learning cycles (Schwartz et al., 1999).  
625 Because students are less limited by the time needed to read and comprehend a complex exam  
626 scenario, more interesting scenarios can be approached by the instructor. Assessment  
627 materials transmit the values of the instructor into real terms (G. Wiggins, 1998, 2011).  
628 Moreover, students can spend their valuable study time working on intriguing, layered problems  
629 instead of re-hashing simple factual information. Students reported being challenged by the  
630 public exam format to more in-depth learning of a concept. In interviews, students realized that  
631 with the extra time to think about and discuss exam questions, there was an expectation of  
632 exam responses that demonstrated deeper thought and synthesis. For example, a CC student  
633 said:

634           *“Personally I liked this type of exam a lot more. I didn't feel like I had to memorize*  
635 *anything. More like I understood the concept and could be asked questions about [it]*  
636 *from multiple angles. It helped learning with others as well because when explaining to*  
637 *other people a certain topic, and they begin to understand tells me that I understand*  
638 *the concept exceptionally well.”*

639 As more disciplines make calls for deeper critical thinking skills (AAAS, 2011b;  
640 Halpern, 2001; McConnell et al., 2019; *Engage to Excel: Producing One Million*  
641 *Additional College Graduates with Degrees in Science, Technology, Engineering, and*  
642 *Mathematics*, 2012), it is possible the pre-release of exam material (as in (Crowther et  
643 al., 2020)) is a motivating factor in pushing students to do, share, and enjoy this  
644 deeper thought.

645           **3) Anxiety** around education (and more specifically exams) is a constant and  
646 increasingly-pressing concern (Disability, 2017; Health, 2020). While this is well-studied in  
647 STEM courses (Cooper et al., 2018; Downing et al., 2020; Schussler et al., 2021), it may be  
648 more relevant instead to courses for which high-stakes exams are a primary feature (Brady et  
649 al., 2018; Culler & Holahan, 1980; Harris et al., 2019). STEM courses (among many others)  
650 generally meet this description (Momsen et al., 2010). Learning is maximized at moderate levels  
651 of stress (Rudland et al., 2020), but greater stress hampers learning and motivation and  
652 disproportionately impacts students from groups traditionally underrepresented in the holders of  
653 college degrees (Lee et al., 2021; Medina, 2011; Misra & McKean, 2000; Vaidya & Mulgaonkar,  
654 2007). There is some indication that this current most-diverse and most-economically  
655 challenged generation of students in college are also understandably the most over-stressed  
656 that have ever enrolled (Lederer & Hoban, 2020). With less anxiety associated with the surprise  
657 of the exam, they were able to feel more confident and prepared. A R1 student noted:

658           *“... with the availability of the public exam I am able to study the possible directions the*  
659           *questions might take. It reduces the amount of stress and anxiety I usually get when I*  
660           *take exams, I feel more prepared.”*

661 Students reported a decrease in anxiety, albeit not always initially. Student experiences suggest  
662 that the positive perception of these exams takes time and that students need to get used to the  
663 new exam style. A CC student described this evolution of mindset:

664           *“At first It was a bit of an adjustment because I had never taken a public exam,*  
665           *but the second time around I enjoyed it.”*

666 This sentiment was reiterated by a R1 student:

667           *“During the first exam of the quarter, the style of the exams did not work for me because*  
668           *the format was new and I barely knew what to do to prepare for it. As of now, the style of*  
669           *the exams is working for me because even though I second guess myself...”*

670 Public exams may help students to alleviate some of their stress through some familiarity with  
671 the assessment itself. The non-content information like formatting can be comprehended at  
672 relative leisure. Strategic points like where to focus effort and time can be usefully discussed  
673 and digested at home. Shifting non-content mental effort out of the exam performance time may  
674 explain why coding analysis shows better outcomes in public exams and would be in line with  
675 prior research (Hacker et al., 2008; Pate et al., 2019). It is also possible that the steps made  
676 towards exam transparency have a role to play, as signals of equitable behavior on the part of  
677 powerful authorities may suggest to students that they need not worry about being caught in a  
678 negative power-dynamic over some other disputed element within assessment (Bang & Medin,  
679 2010; Bell et al., 2012; Fredricks et al., 2004).

680           Beyond these three emergent aspects of the student experience, student self-reported  
681 preferences for exam style were strongly in favor of public exams. While it appears that students  
682 prefer public exam questions in this context, and that those preferences are not explainable by  
683 demographics or class success, these data are presented only as a triangulation of other data  
684 sources. If these preference surveys can be taken at face value, then student preferences for  
685 public exam questions are relatively strong and in accordance with findings from open-ended  
686 coding and qualitative interview analysis.

687  
688           Public exams include opportunities for students to authentically engage in the creation of  
689 the assessment through edits and suggestions. Students who took advantage of these  
690 opportunities also performed better in the class. Those edits are sparse among many exam  
691 questions, and the changes suggested rarely alter content, so this trend is unlikely to be  
692 explainable by gains on the specific question edited by the student. The statistical model used  
693 controlled for demographics and for student course grade, so it is less likely that this is a self-  
694 selection of which students choose to take on this extra task. If the correlation observed ( $p$  value  
695 = 0.000402) indicates a causative relationship, then it may be explainable in one of three ways.  
696 It might be that students who engage with the exam in this editorial mode are finding a new way  
697 to engage with the material. By seeing the content from a different angle, one more closely  
698 aligned with the perspective of the faculty instructor, they may find their own perspective on the  
699 content to be broadened in useful ways. This is in line with learning theory about critical thinking  
700 skills (Halpern, 2001). A second possibility is that engaging with assessment as a partner, even

701 in a temporary way, may help students to feel authentically involved in the process of  
702 assessment. Affective impacts can improve learning (Dweck, 1986), so this specific observation  
703 would be in line with learning theory. Lastly, it is possible that this result conflates students who  
704 did not provide edits with students who never accessed the public exam materials (even after  
705 frequent instructor guidance), which might contribute to their lower course grade. In the first two  
706 models, the benefit to student learning would be valuable and further research will be required  
707 to better understand how, for which students, and under what conditions this benefit is  
708 generated.

709

710 *Do public exams impact grade inequity?*

711 Prerequisite to understanding more about the specific impacts of public exams, and as part  
712 of feminist and anti-racist drives within education research, we want to ensure that public exams  
713 do not contribute to the extant inequities in student outcomes within postsecondary education  
714 (Museus et al., 2015). Those concerns are most pressing for assessments, which often  
715 represent a gateway for student success at which inequities are both created and revealed. The  
716 primary goal of our quantitative within-exam experimental design in a large R1 course was to  
717 help understand if public exams are creating or exacerbating inequities for students from groups  
718 historically marginalized in postsecondary education. Analysis of question-by-question exam  
719 outcomes in a large course is our most likely opportunity to observe a signal of inequitable  
720 outcomes. Close analysis of question-by-question outcomes make clear that these pernicious  
721 gaps in outcomes exist beyond our research environment: Students from minoritized groups are  
722 associated with lower scores on both public and traditional exam questions. Clearly, improving  
723 outcomes for all students will take much more than the use of public exams. Of particular  
724 importance for our study is that outcome gaps are not exacerbated by public exams. In other  
725 words, the gaps between public and traditional question outcomes are not different between  
726 groups of students. While we could imagine a hypothetical situation where some benefits from  
727 an intervention might be so positive as to be worth some negative impact on equity, it is  
728 relieving to know that this choice does not appear to be necessary and that public exams  
729 appear to be as inequitable or equitable as existing traditional exams.

730

731 *Are public exams likely to be applicable across postsecondary contexts?*

732 Our analysis is largely based on data collected in an R1 institution. While R1 institutions  
733 are frequently the site for postsecondary education research projects, they account for a  
734 relatively small proportion of postsecondary students. Crucially, interventions must be useful in  
735 larger contexts like primarily undergraduate institutions, comprehensive colleges, and (perhaps  
736 most importantly) the vast community college system. To better understand whether public  
737 exams might be applicable to community college courses, which are generally smaller and less  
738 available to quantitative research, we undertook a similar qualitative study in a community  
739 college course.

740 For example, a CC student noted that:

741 "we were able to sit down and start bouncing information off of each other and asking  
742 different questions about the questions...just kinda sharing information right before the

743 *exam and that just gave me so much confidence as to how much I know going into the*  
744 *exam so”*

745 This student suggests a deeper questioning style beyond memorization, and notes the  
746 affective impact of this practice as well. A second CC participant mentioned:

747 *“it helps more with like understanding but sometimes when you’re panicking about an*  
748 *exam you’re like ‘I don’t want understanding ; I just wanna know’ but at the same time*  
749 *you do have to understand things...if we hadn’t had the public exam I would have studied*  
750 *all five of the chapters and had like less knowledge on each of the things and I don’t feel*  
751 *like I would have remembered the exact definition of phenotypic plasticity as well as like*  
752 *when I saw the question and was like, I really do need to know this for the exam.”*

753 These three themes of Anxiety, Directing to core concepts and Deepening thought are evident  
754 here and were strongly present in both environments. Weaker themes of collaboration,  
755 language issues on exams, and authentic engagement with assessment were evident in both  
756 environments but less so. While we did identify emergent themes in this work, no thematic  
757 signals appeared to us in one environment and not the other. This is an initial attempt to explore  
758 the possible broad application of public exams, and clearly more research will be required on a  
759 greater scale to make similar conclusions. In the meantime, the outcomes of these analyses are  
760 consistent with public exams being similarly applicable across these two institution types.

761  
762

#### 763 *Limitations of this study:*

764 As an initial foray into research on public exams, this study has many limitations. The  
765 design-based research model used in this study is likely to unearth important features of the  
766 student educational experience. However, this model is not intended to prove that a particular  
767 feature is more or less important than another, or to compare overall impacts of the student  
768 experience on learning or career success. Future research, using longitudinal analysis and  
769 topical challenges, will be important for assessing the overall impacts of the public exam  
770 intervention beyond these initial analyses. Constructs like anxiety are treated as emergent  
771 themes; future research should apply established theoretical frameworks around anxiety to  
772 make use of established survey instruments that may be a good fit to better understand the  
773 ways in which and extent to which public exams affect student anxiety. The core features of  
774 public exams are examined as a unit, and more work will be required to understand if benefits  
775 can be achieved modularly. Largely a single-course study, this analysis may be conflated by the  
776 specific instructors or the environment of early 2021 (in itself, a unique time to be working in  
777 postsecondary education during a pandemic). Education impacts tend to be relatively weak in  
778 comparison to impact size of other fields, so it is possible that other important features have  
779 gone unexamined for lack of analytic power in a single course of 300 students. This is especially  
780 true for particular groups of students of historic importance, for whom numbers are smaller and  
781 backgrounds unique to this particular study environment. Furthermore, the newness of the  
782 public exam style in post-secondary classrooms means that existing instruments for  
783 investigating assessments on more traditional models was not appropriate. Future research  
784 should involve validation of specific instruments for assessing these learning cycles, such as  
785 those seen in (Arikan et al., 2022; Chang et al., 2021; Hicks et al., 2017; Johnson et al., 2022;

786 Reynders et al., 2020). Perhaps most importantly, this study did not directly assess student  
787 learning but rather the student experience. We hope that the benefits demonstrated, combined  
788 with positive anecdotal reports on the strengthened student/instructor relationships in similar  
789 courses, motivate future research to better understand how varied assessment styles can better  
790 serve the next generation of students and improve on this work.

791 One salient criticism of public exams is that the process can be summarily characterized  
792 as ‘teaching to the test’. This pejorative has a long and well-deserved history in K-12 education,  
793 especially in situations where externally-created assessments are linked to a motivation to  
794 maximize scores for the purposes of accumulating outcome-linked resources (Jensen et al.,  
795 2014; Ravitch, 2020). We propose that many college and university exams are fundamentally  
796 different in that the instructors have wide purview to create exactly the kinds of assessments  
797 that reflect the values, skills and content needed in modern pursuits. In other words, professors  
798 can create the kinds of exams for which ‘teaching to the exam’ is a great thing for students.  
799 Creating worthwhile assessments that help students to develop relevant and high-level skills is  
800 a core principle of educative assessment (Jensen et al., 2014; G. Wiggins, 1998). We hope that  
801 public exams are a useful way to do this.

802

803 *Considerations for interested practitioners:*

804 Transitioning from traditional exams to a public exam style is a low-tech strategy to  
805 employ many of the practices identified in education literature to improve student learning.  
806 Instructors found that they could make simple changes to the exams or exam blueprints that  
807 they were already using by withholding some of the information. In many cases these  
808 adjustments shorten the exam by augmenting the higher cognitive exam questions and allowing  
809 students to discuss core concepts in more detail because students had more time to reflect on  
810 the question. Additionally, instructors were receiving meaningful feedback from students during  
811 the editing process of their new public exam that improved their exam questions. Importantly,  
812 instructors do not need to adjust the entire exam to the public method. Instructors can slowly  
813 transition to a greater percentage of the exam being publicly available over the quarter or  
814 semester or academic year. Anecdotally, students were excited to be part of the public exam  
815 process and a new assessment strategy that they participated in. This is the first research that  
816 we know of that has examined the impact of public exams on R1 and CC students. Our  
817 research suggests that public exams do not appear to create additional inequity, work similarly  
818 for R1 and CC students and, perhaps most importantly, are valued by students themselves.  
819 More research is going to be important to understand the impacts this type of exam has on  
820 student learning, particularly with respect to anxiety and impacts on students from minoritized  
821 groups.

822 Postsecondary instructors have numerous choices when designing exams (Gezer-  
823 Templeton et al., 2017; Hodges, 2004; Knierim et al., 2015; Wieman et al., 2014). For those  
824 who want to take up public exams as a classroom practice, we suggest adjusting a small  
825 number of questions on an upcoming exam into a public, pre-released style. This helps create a  
826 positive feedback loop for instructor design and feedback from students, and it also helps to



827 avoid taking on an unsustainable overhaul of all assessment in one course. In our experience,  
828 instructors who take up a few challenging pre-released exam questions a) quickly develop the  
829 communication needed for students to understand how and why to access the materials, and b)  
830 invariably lead to greater use of these methods in future assessments. Discussing an exam  
831 draft with someone experienced in public exams is especially useful; please do write to the  
832 corresponding author if this would be useful for you. A few examples of public exams (both pre-  
833 released and final versions) are available here in supplemental materials. An earlier, deeper,  
834 non-peer-reviewed logistical discussion of public exams within the field of molecular biology  
835 may be of interest to practitioners (B. L. Wiggins, 2019).

836

837 As already discussed, anxiety around education, particularly associated with exams,  
838 does not impact all groups of students equally. We have proposed that public exams may be a  
839 strategy to address some of the anxiety associated with taking exams. It is important to note  
840 that this student adjustment period as instructors move away from a more traditional exam may  
841 be longer for some students compared to others. Instructors may need to provide guidance and  
842 support during this adjustment period into the exam process. Some strategies that could  
843 facilitate a smoother transition are starting off with lower stakes quizzes or exams, practice  
844 assignments or quizzes, or setting up student groups where students can support each other.  
845 Although we did not find support for “Collaboration” in the quantitative coding analysis, at least  
846 some students recognized the advantage in collaboration when preparing for the exam. A R1  
847 student described this by saying:

848 *“I have noticed that it only works for me when I work with other people in study*  
849 *sessions. I try to study on my own. I have a more difficult time understanding the*  
850 *material, which is something quite new to me since I am used to studying on my own.*  
851 *But overall I like it.”*

852 Students may not have recognized that collaboration was not only acceptable but highly  
853 encouraged, often not utilizing that strategy until later exams. As a CC participant explained:

854 *“I loved the second exam because I was able to meet up with others outside of the*  
855 *classroom to go over a couple different concepts before the exam.”*

856 Emphasizing and encouraging collaboration as a strategy for student success on the exam, may  
857 be another way the instructor can facilitate the transition from a more traditional exam model.

858

859

860 *Conclusion:*

861 In an initial study, we analyzed the impacts of public exams on student class experiences.  
862 Our mixed-methods design research shows that students find significant positive impacts on  
863 their experiences. Those impacts are largely focused on improving the direction of students to  
864 core concepts, the deepening of thought in the assessment process, and structural assistance  
865 for students in managing negative stress and anxiety. The public exam method is likely to be  
866 similarly equitable to traditional methods and potentially applicable across institutional contexts  
867 without exacerbating issues of educational equity. We present this work in the spirit of improving  
868 assessment for all students as a core feature of critical, high-quality education.

869

870

871  
872  
873  
874  
875

876 Acknowledgments:

877 This work was funded by the generosity of a private, independent research gift from  
878 CourseHero, without which none of this research would have been possible. Participants and  
879 their data are protected by Institutional Review Boards under #s STUDY00012237 (University of  
880 Washington), ECIRB-20210512 (Edmonds Community College) and IRB-2020-0813 (Oregon  
881 State University). Thank you to the volunteers and staff at Seattle Public Libraries for  
882 maintaining access to research-quality facilities even throughout a global pandemic. We  
883 appreciate the efforts and contributions of Greg Crowther, Deb Donovan, Kelly Hennessey, Lori  
884 Kayes, Devon Quick, Christine Savolainen, Mandy Schivell, Katie Simons, Shelley Stromholt,  
885 Jeannette Takashima, Liz Warfield, and Seth Wiggins. C.A.B was supported by an NSF  
886 Graduate Research Fellowship Program Grant No. 026257-001. Any opinions, findings, and  
887 conclusions or recommendations expressed in this material are those of the authors(s) and do  
888 not necessarily reflect the views of the National Science Foundation.

889

890

891

892

893 Bibliography:

- 894 1. Stobart G, Eggen T. High-stakes testing—value, fairness and consequences.  
895 Assess Educ Princ Policy Pract. 2012;19(1):1–6.
- 896 2. Wideen MF, O’Shea T, Pye I, Ivany G. High-stakes testing and the teaching of  
897 science. Can J Educ Can Léducation. 1997;428–44.
- 898 3. Ambrose SA, editor. How learning works: seven research-based principles for  
899 smart teaching. 1st ed. San Francisco, CA: Jossey-Bass; 2010. 301 p. (The Jossey-Bass  
900 higher and adult education series).
- 901 4. Handelsman J. Scientific teaching. New York: W.H. Freeman and Co.; 2006.
- 902 5. Intemann K. Why diversity matters: Understanding and applying the diversity  
903 component of the National Science Foundation’s broader impacts criterion. Soc Epistemol.  
904 2009;23(3–4):249–66.
- 905 6. Hurtado S. Linking diversity with the educational and civic missions of higher  
906 education. Rev High Educ. 2007;30(2):185–96.
- 907 7. Rossing JP, Lavitt MR. The neglected learner: A call to support integrative  
908 learning for faculty. Lib Educ. 2016;102(2):34–41.
- 909 8. Wiggins G. Educative Assessment. Designing Assessments To Inform and  
910 Improve Student Performance. ERIC; 1998.
- 911 9. Wiggins G. A true test: Toward more authentic and equitable assessment. Phi  
912 Delta Kappan. 2011;92(7):81–93.
- 913 10. Buxton CA, Alleksaht-Snider M, Suriel R, Kayumova S, Choi Y, Bouton B, et al. Using  
914 educative assessments to support science teaching for middle school English-language  
915 learners. J Sci Teach Educ. 2013;24(2):347–66.
- 916 11. Jönsson A. Educative assessment for/of teacher competency. A study of assessment  
917 and learning in the "Interactive examination" for student teachers. Malmö University; 2008.
- 918 12. Fink LD. A self-directed guide to designing courses for significant learning. Univ Okla.  
919 2003;27(11):1–33.
- 920 13. Sweller J. Cognitive load theory: Recent theoretical advances. 2010;
- 921 14. Brown B. Braving the wilderness: The quest for true belonging and the courage to  
922 stand alone. Random House; 2017.
- 923 15. Zeichner KM, Miller L, Silvernail DL, Darling-Hammond L, American Association of  
924 Colleges for Teacher Education, National Commission on Teaching & America’s Future (U.  
925 S.). Studies of excellence in teacher education □: preparation in the undergraduate years.  
926 Washington, DC: AACTE Publications; 2000. xi, 109 p. p.
- 927 16. Darling-Hammond L, Bransford J. Preparing teachers for a changing world □: what  
928 teachers should learn and be able to do. 1st ed. San Francisco, CA: Jossey-Bass; 2005.  
929 xxx, 593 p. p.
- 930 17. Sawyer RK. The Cambridge Handbook of the Learning Sciences. 2nd ed. Cambridge  
931 University Press; 2006. 784 p. (Cambridge Handbooks in Psychology).
- 932 18. Kirschner PA. Cognitive load theory: Implications of cognitive load theory on the  
933 design of learning. Elsevier; 2002.
- 934 19. Moreira BFT, Pinto TSS, Starling DSV, Jaeger A. Retrieval practice in classroom  
935 settings: a review of applied research. In: Frontiers in Education. Frontiers; 2019. p. 5.

- 936 20. Bonwell CC, Eison JA. *Active Learning: Creating Excitement in the Classroom*.  
937 Washington, D.C.: The George Washington University, School of Education and Human  
938 Development; 1991.
- 939 21. Obuaku-Igwe C. Teaching and Re-Imagining the Role of Medical Sociology in South  
940 Africa During COVID-19: A Reflection. In: *Strategies for Student Support During a Global*  
941 *Crisis*. IGI Global; 2021. p. 175–94.
- 942 22. Shi T, Blau E. Contemporary Theories of Learning and Pedagogical Approaches for  
943 All Students to Achieve Success. In: *Optimizing Higher Education Learning Through*  
944 *Activities and Assessments*. IGI Global; 2020. p. 20–37.
- 945 23. Collins A, Joseph D, Bielaczyc K. Design Research: Theoretical and Methodological  
946 Issues. *J Learn Sci*. 2004 Jan 1;13:15–42.
- 947 24. Sandoval W& B. Design-based Research Methods for Studying Learning in Context.  
948 *Educ Psychol*. 2004;39:3.
- 949 25. Meyer H. Novice and expert teachers' conceptions of learners' prior knowledge. *Sci*  
950 *Educ*. 2004;88(6):970–83.
- 951 26. Bransford JD, Brown AL, Cocking RR. *How people learn: Brain, mind, experience,*  
952 *and school*. National Academy Press; 1999.
- 953 27. Dahlberg C, Lee S, Leaf D, Lily L, Wiggins B, Jordt H, et al. A Short, Course-Based  
954 Research Module Provides Metacognitive Benefits in the Form of More Sophisticated  
955 Problem Solving. *J Coll Sci Teach [Internet]*. 2019 [cited 2019 Jul 29];048(04). Available  
956 from: [https://www.nsta.org/store/product\\_detail.aspx?id=10.2505/4/jcst19\\_048\\_04\\_22](https://www.nsta.org/store/product_detail.aspx?id=10.2505/4/jcst19_048_04_22)
- 957 28. Wiggins BL, Sefi-Cyr H, Lily LS, Dahlberg CL. Repetition Is Important to Students and  
958 Their Understanding during Laboratory Courses That Include Research. Vol. 22, *Journal of*  
959 *Microbiology & Biology Education*. 2021. p. e00158-21.
- 960 29. Wiggins BL, Eddy SL, Wener-Fligner L, Freisem K, Grunspan DZ, Theobald EJ, et al.  
961 ASPECT: A Survey to Assess Student Perspective of Engagement in an Active-Learning  
962 Classroom. *Cbe-Life Sci Educ*. 2017 Jun 20;16.
- 963 30. Rubin HJ. *Qualitative interviewing: the art of hearing data*. 3rd ed. Thousand Oaks,  
964 Calif.: SAGE; 2012.
- 965 31. Glaser BG, Strauss AL. *The discovery of grounded theory: strategies for qualitative*  
966 *research*. London,: Weidenfeld and Nicolson; 1968. xiii, 271 p. p. (Observations).
- 967 32. Linehan MM. *Cognitive-behavioral treatment of borderline personality disorder*.  
968 Guilford Publications; 2018.
- 969 33. Cameron J. Focusing on the focus group. In: *Qualitative Research Methods in Human*  
970 *Geography*. Oxford: Oxford University Press; 2005. p. 116–32.
- 971 34. Saunders B, Sim J, Kingstone T, Baker S, Waterfield J, Bartlam B, et al. Saturation in  
972 qualitative research: exploring its conceptualization and operationalization. *Qual Quant*.  
973 2018;52(4):1893–907.
- 974 35. Wright CD, Eddy SL, Wenderoth MP, Abshire E, Blankenbiller M, Brownell SE.  
975 Cognitive difficulty and format of exams predicts gender and socioeconomic gaps in exam  
976 performance of students in introductory biology courses. *CBE—Life Sci Educ*.  
977 2016;15(2):ar23.

- 978 36. Freeman S, Theobald R, Crowe AJ, Wenderoth MP. Likes attract: Students self-sort  
979 in a classroom by gender, demography, and academic characteristics. *Act Learn High*  
980 *Educ.* 2017;18(2):115–26.
- 981 37. Stanich CA, Pelch MA, Theobald EJ, Freeman S. A new approach to supplementary  
982 instruction narrows achievement and affect gaps for underrepresented minorities, first-  
983 generation students, and women. *Chem Educ Res Pract.* 2018;19(3):846–66.
- 984 38. Odom S, Boso H, Bowling S, Brownell S, Cotner S, Creech C, et al. Meta-analysis of  
985 Gender Performance Gaps in Undergraduate Natural Science Courses. *CBE—Life Sci*  
986 *Educ.* 2021;20(3):ar40.
- 987 39. Cooper KM, Auerbach AJJ, Bader JD, Beadles-Bohling AS, Brashears JA, Cline E, et  
988 al. Fourteen Recommendations to Create a More Inclusive Environment for LGBTQ+  
989 Individuals in Academic Biology. *CBE—Life Sci Educ.* 2020 Jul 14;19(3):es6.
- 990 40. McCrum-Gardner E. Which is the correct statistical test to use? *Br J Oral Maxillofac*  
991 *Surg.* 2008;46(1):38–41.
- 992 41. Bower KM. When to use Fisher's exact test. In: American Society for Quality, Six  
993 Sigma Forum Magazine. 2003. p. 35–7.
- 994 42. Anderson LW, Krathwohl DR, editors. A taxonomy for learning, teaching, and  
995 assessing: a revision of Bloom's taxonomy of educational objectives. Complete ed. New  
996 York: Longman; 2001. 352 p.
- 997 43. Lemons PP, Lemons JD. Questions for assessing higher-order cognitive skills: It's not  
998 just Bloom's. *CBE—Life Sci Educ.* 2013;12(1):47–58.
- 999 44. Barnett JE, Francis AL. Using higher order thinking questions to foster critical  
1000 thinking: A classroom study. *Educ Psychol.* 2012;32(2):201–11.
- 1001 45. Schwartz DL, Lin X, Brophy S, Bransford JD. Toward the development of flexibly  
1002 adaptive instructional designs. *Instr-Des Theor Models New Paradigm Instr Theory.*  
1003 1999;2:183–213.
- 1004 46. AAAS. Vision and Change in Undergraduate Biology Education □ » Final Report  
1005 [Internet]. 2011 [cited 2015 Oct 11]. Available from: <http://visionandchange.org/finalreport/>
- 1006 47. Presidents Council of Advisors on Science and Technology. Engage to Excel:  
1007 Producing One Million Additional College Graduates with Degrees in Science, Technology,  
1008 Engineering, and Mathematics. 2012.
- 1009 48. McConnell KD, Horan EM, Zimmerman B, Rhodes TL. We Have a Rubric for That:  
1010 The VALUE Approach to Assessment. ERIC; 2019.
- 1011 49. Halpern DF. Assessing the effectiveness of critical thinking instruction. *J Gen Educ.*  
1012 2001;50(4):270–86.
- 1013 50. Crowther G, Wiggins B, Jenkins L. Testing in the Age of Active Learning: Test  
1014 Question Templates Help to Align Activities and Assessments. *HAPS Educ.* 2020 May  
1015 6;24:74–81.
- 1016 51. Disability NC on. Mental health on college campuses: Investments, accommodations  
1017 needed to address student needs. 2017;
- 1018 52. Health C for CM. 2020 Annual report (Publication No. STA 21-045). 2020;
- 1019 53. Schussler EE, Weatherton M, Chen Musgrove MM, Brigati JR, England BJ. Student  
1020 Perceptions of Instructor Supportiveness: What Characteristics Make a Difference? *CBE—*  
1021 *Life Sci Educ.* 2021;20(2):ar29.

- 1022 54. Cooper KM, Downing VR, Brownell SE. The influence of active learning practices on  
1023 student anxiety in large-enrollment college science classrooms. *Int J STEM Educ.*  
1024 2018;5(1):1–18.
- 1025 55. Downing VR, Cooper KM, Cala JM, Gin LE, Brownell SE. Fear of Negative Evaluation  
1026 and Student Anxiety in Community College Active-Learning Science Courses. Vol. 19,  
1027 CBE—Life Sciences Education. 2020. p. ar20.
- 1028 56. Brady ST, Hard BM, Gross JJ. Reappraising test anxiety increases academic  
1029 performance of first-year college students. *J Educ Psychol.* 2018;110(3):395.
- 1030 57. Culler RE, Holahan CJ. Test anxiety and academic performance: The effects of study-  
1031 related behaviors. *J Educ Psychol.* 1980;72(1):16.
- 1032 58. Harris RB, Grunspan DZ, Pelch MA, Fernandes G, Ramirez G, Freeman S. Can test  
1033 anxiety interventions alleviate a gender gap in an undergraduate STEM course? CBE—  
1034 Life Sci Educ. 2019;18(3):ar35.
- 1035 59. Momsen JL, Long TM, Wyse SA, Ebert-May D. Just the facts? Introductory  
1036 undergraduate biology courses focus on low-level cognitive skills. CBE—Life Sci Educ.  
1037 2010;9(4):435–40.
- 1038 60. Rudland JR, Golding C, Wilkinson TJ. The stress paradox: how stress can be good  
1039 for learning. *Med Educ.* 2020;54(1):40–5.
- 1040 61. Lee J, Jeong HJ, Kim S. Stress, anxiety, and depression among undergraduate  
1041 students during the COVID-19 pandemic and their use of mental health services. *Innov*  
1042 *High Educ.* 2021;1–20.
- 1043 62. Misra R, McKean M. College students' academic stress and its relation to their  
1044 anxiety, time management, and leisure satisfaction. *Am J Health Stud.* 2000;16(1):41.
- 1045 63. Vaidya PM, Mulgaonkar KP. Prevalence of depression anxiety and stress in  
1046 undergraduate medical students and its co-relation with their academic performance.  
1047 *Indian J Occup Ther Indian J Occup Ther.* 2007;39(1).
- 1048 64. Medina J. Brain rules: 12 principles for surviving and thriving at work, home, and  
1049 school. *ReadHowYouWant.com*; 2011.
- 1050 65. Lederer AM, Hoban MT. The development of the American College Health  
1051 Association-National College Health Assessment III: An improved tool to assess and  
1052 enhance the health and well-being of college students. *J Am Coll Health.* 2020;1–5.
- 1053 66. Pate A, Lafitte EM, Ramachandran S, Caldwell DJ. The use of exam wrappers to  
1054 promote metacognition. *Curr Pharm Teach Learn.* 2019;11(5):492–8.
- 1055 67. Hacker DJ, Bol L, Keener MC. Metacognition in education: A focus on calibration.  
1056 *Handb Metamemory Mem.* 2008;429455.
- 1057 68. Bang M, Medin D. Cultural processes in science education: Supporting the navigation  
1058 of multiple epistemologies. *Sci Educ.* 2010;94:1008–26.
- 1059 69. Bell P, Tzou C, Bricker L, Baines A. Learning in Diversities of Structures of Social  
1060 Practice: Accounting for How, Why and Where People Learn Science. *Hum Dev.* 2012 Jan  
1061 1;55:269–84.
- 1062 70. Fredricks JA, Blumenfeld PC, Paris AH. School engagement: Potential of the concept,  
1063 state of the evidence. *Rev Educ Res.* 2004;74(1):59–109.
- 1064 71. Dweck CS. Motivational processes affecting learning. *Am Psychol.* 1986;41:1040.

- 1065 72. Museus SD, Ledesma MC, Parker TL. Racism and Racial Equity in Higher Education.  
1066 ASHE High Educ Rep. 2015 Nov 1;42(1):1–112.
- 1067 73. Johnson C. Teaching to the test: How schools discourage phronesis. In: Vice  
1068 Epistemology. Routledge; 2020. p. 225–38.
- 1069 74. Ravitch D. How, and How Not, to Improve Schools. N Y. 2020;
- 1070 75. Jensen JL, McDaniel MA, Woodard SM, Kummer TA. Teaching to the test... or  
1071 testing to teach: Exams requiring higher order thinking skills encourage greater conceptual  
1072 understanding. *Educ Psychol Rev*. 2014;26(2):307–29.
- 1073 76. Gezer-Templeton PG, Mayhew EJ, Korte DS, Schmidt SJ. Use of exam wrappers to  
1074 enhance students' metacognitive skills in a large introductory food science and human  
1075 nutrition course. *J Food Sci Educ*. 2017;16(1):28–36.
- 1076 77. Knierim K, Turner H, Davis RK. Two-stage exams improve student learning in an  
1077 introductory geology course: Logistics, attendance, and grades. *J Geosci Educ*.  
1078 2015;63(2):157–64.
- 1079 78. Wieman CE, Rieger GW, Heiner CE. Physics exams that promote collaborative  
1080 learning. *Phys Teach*. 2014;52(1):51–3.
- 1081 79. Hodges LC. Group exams in science courses. *New Dir Teach Learn*.  
1082 2004;2004(100):89–93.
- 1083 80. Wiggins BL. The Public Exam System: Simple Steps to More Effective Tests.  
1084 CourseHero Faculty Club [Internet]. 2019 Aug 6; Available from:  
1085 <https://www.coursehero.com/faculty-club/classroom-tips/benjamin-wiggins/>
